## Revealing the Complexities of Metabarcoding with a Diverse Arthropod Mock Community

Thomas W. A. Braukmann<sup>1\*</sup>, Natalia V. Ivanova<sup>1</sup>, Sean W. J. Prosser<sup>1</sup>, Vasco Elbrecht<sup>1</sup>, Dirk Steinke<sup>1,2</sup>, Sujeewan Ratnasingham<sup>1</sup>, Jeremy R. deWaard<sup>1,3</sup>, Jayme E. Sones<sup>1</sup>, Evgeny V. Zakharov<sup>1</sup>, and Paul D. N. Hebert<sup>1,2</sup>

<sup>1</sup> Centre for Biodiversity Genomics, University of Guelph, Guelph ON, Canada N1G 2W1

<sup>2</sup> Department of Integrative Biology, University of Guelph, Guelph ON, Canada N1G 2W1

<sup>3</sup> School of Environmental Sciences, University of Guelph, Guelph, ON, Canada N1G 2W1

\* Corresponding author email: [tbraukma@uoguelph.ca](mailto:tbraukma@uoguelph.ca)

## 1 **Abstract**

2 DNA metabarcoding is an attractive approach for monitoring biodiversity. However, it is subject  
3 to biases that often impede detection of all species in a sample. In particular, the proportion of  
4 sequences recovered from each species depends on its biomass, mitome copy number, and  
5 primer set employed for PCR. To examine these variables, we constructed a mock community  
6 of terrestrial arthropods comprised of 374 BINs, a species proxy. We used this community to  
7 examine how species recovery was impacted when amplicon pools were constructed in four  
8 ways. The first two protocols involved the construction of bulk DNA extracts from different  
9 body partitions (Bulk Abdomen, Bulk Leg). The other protocols involved the production of DNA  
10 extracts from single legs which were then merged prior to PCR (Composite Leg) or PCR-  
11 amplified separately (Single Leg) and then pooled. The amplicon generated by these four  
12 treatments were then sequenced on three platforms (Illumina MiSeq, Ion Torrent PGM and Ion  
13 Torrent S5). The choice of sequencing platform did not substantially influence species recovery,  
14 other variables did. As expected, the best recovery was obtained from the Single Leg treatment,  
15 but the Bulk Abdomen produced a more uniform read abundance than the Bulk Leg or  
16 Composite Leg samples. Primer choice also influenced species recovery. Our results reveal how  
17 variation in protocols can have substantive impacts on perceived diversity unless sequencing  
18 coverage is sufficient to reach an asymptote. Although metabarcoding is a powerful approach,  
19 further optimization of analytical protocols is crucial to obtain reproducible results and increase  
20 its cost-effectiveness.

## 21 Introduction

22 It is generally accepted that we have entered a period of unprecedented global  
23 biodiversity loss (Pimm et al. 2014, Vogel 2017). Halting it will require the capacity to quantify  
24 shifts in species composition rapidly and on a far larger scale than ever before so we can better  
25 understand and manage ecosystems (Ji et al. 2013; Cristescu 2014; Moriniere et al. 2016,  
26 Waldron et al 2017). As arthropods account for the majority of terrestrial biodiversity  
27 (Medeiros et al. 2013), they are an obvious target for bio-surveillance. Although they are easily  
28 collected in large numbers (Russo et al. 2011), the subsequent processing and identification of  
29 specimens has traditionally been a barrier to large-scale monitoring programs (Bassett et al.  
30 2012). DNA barcoding, the use of short standardized gene regions to discriminate species,  
31 breaks this barrier by enabling non-taxonomists to identify specimens once a reference  
32 sequence library is established (Hebert et al. 2003; Hebert and Gregory 2005).

33 DNA barcode studies initially focused on developing the analytical protocols required to  
34 construct a specimen-based reference library (Hebert et al. 2003; Hebert et al. 2004). Although  
35 improved protocols have reduced costs, making it possible to analyze millions of single  
36 specimens (Hajibabaei et al. 2005; Ivanova et al. 2006; Hebert et al. 2018), they are still too  
37 expensive to support large-scale bio-monitoring programs. However, by coupling a DNA  
38 barcode reference library with the analytical capacity of high-throughput sequencers (HTS),  
39 DNA metabarcoding provides a path to rapid, low-cost assessments of species composition  
40 (Hajibabaei et al. 2011; Yu et al. 2012; Brandon-Mong et al. 2015; Moriniere et al. 2016). It  
41 achieves this goal by the amplification and sequence characterization of the barcode region  
42 from bulk DNA extracts which can then be assigned to operational taxonomic units (OTUs) that

43 can be queried against reference sequences to ascertain their source species (see Cristescu  
44 2014). Studies have now employed this approach to assess species composition in communities  
45 of aquatic and terrestrial arthropods (Ji et al. 2013; Beng et al. 2016; Elbrecht et al. 2017B),  
46 vertebrates (Sato et al. 2017), diatoms (Vasselon et al. 2017), and fungi (Bellemain et al. 2012;  
47 Aas et al. 2017; Tedersoo et al. 2018). Metabarcoding can reveal more species than  
48 morphological approaches while requiring far less time (Ji et al. 2013; Yu et al. 2012; Vivien et  
49 al. 2016; Brandon-Mong et al. 2015; Elbrecht et al. 2017A; Hebert et al. 2018; Shokralla et al.  
50 2015; Elbrecht et al 2017B).

51 Despite the advantages of metabarcoding, several factors often complicate the recovery  
52 of all species in a sample. Firstly, DNA templates derived from the species in a mixed sample are  
53 often differentially amplified (Elbrecht and Leese 2015; Pinol et al. 2015; Elbrecht and Leese  
54 2017; Tedersoo et al. 2018). Such bias can arise from either the DNA polymerase (Nichols et al.  
55 2018; Pan et al. 2014, Dabney and Meyer 2012) or the primers (Clarke et al. 2014) employed for  
56 PCR. Polymerase bias involves the differential amplification of templates as a result of their  
57 variation in sequence motifs, GC content, or length (Nichols et al. 2018; Pan et al. 2014, Dabney  
58 and Meyer 2012). Primer bias is due to either varying levels of primer mismatch or template  
59 degradation (Clarke et al. 2014; Elbrecht and Leese 2015). The impact of primer mismatches  
60 can often be reduced by either lowering annealing temperatures or by raising the degeneracy  
61 of the primers (Clarke et al. 2014; Elbrecht and Leese 2017). However, these 'solutions' have a  
62 downside; they often increase the amplification of non-target sequences such as bacterial  
63 endosymbionts or mitochondrial pseudogenes, which is especially problematic for eDNA  
64 samples (Smith et al. 2012; Song et al. 2008; Macher et al. 2018).

65           The capacity of metabarcoding to recover all species in a bulk sample is further  
66 complicated because the component species typically vary by several orders of magnitude in  
67 mass and hence in copy numbers of the target template. Unless other factors intervene, this  
68 variation in template number means that large-bodied species are more likely to be recovered  
69 (Brandon-Mong et al. 2015). Because of this effect (in addition to primer bias), efforts to infer  
70 species abundance from the read counts obtained in metabarcoding studies are at best weak  
71 (Elbrecht and Leese 2015; Pinol et al. 2014). Correction factors can improve such estimates  
72 (Thomas et al. 2015; Vasselon et al 2017), but any method based on the analysis of bulk DNA  
73 extracts will fail to accurately estimate species abundance.

74           In addition to factors complicating the recovery of sequences from all species in a bulk  
75 sample, sequence variation introduced during PCR, library preparation, and sequencing can  
76 make it difficult to assign sequences to their source species (Tedersoo et al. 2018). PCR error  
77 can be reduced by the use of high-fidelity polymerases (Lee et al. 2016; Potapov et al. 2017),  
78 but it is more difficult to escape complexities introduced by sequencing error because all  
79 second-generation sequencers have error rates (e.g. 1–2%) that are high enough to complicate  
80 the discrimination of closely-related species. Third-generation sequencers, such as Pacific  
81 Biosciences Sequel (e.g. Hebert et al. 2018), can produce much lower error rates, but they  
82 currently generate too few reads (circa 0.2 million/run) to reveal all species in a taxonomically  
83 diverse sample (Tedersoo et al. 2018). As a consequence, despite their high error rates, second-  
84 generation platforms (Illumina, Ion Torrent) are commonly used for metabarcoding as they  
85 produce many millions of reads per run (Mardis et al. 2013, Cristescu 2014). Illumina  
86 sequencers generate more reads (20–250 million/run) with lower error rates than Ion Torrent

87 platforms, but the latter instruments can deliver longer reads more rapidly (Mardis et al. 2013).  
88 It is unclear how severely the choice of HTS platform affects species recovery as their  
89 performance has rarely been compared in eukaryotes (Divolli et al. 2018). However, work on  
90 microbial communities found general agreement between platforms although Ion Torrent  
91 reads were lower quality and more length variable than those from Illumina (Salipante et al.  
92 2014; Tessler et al. 2017).

93 To examine factors influencing the success in recovering species through metabarcode  
94 analysis, we assembled a mock community that included a single representative of 374 species.  
95 We subsequently used this community to examine the impacts of DNA source, extraction  
96 method, PCR protocol, target template, and sequencing platform on species recovery.  
97 Specifically, we compared results obtained by analyzing four amplicon pools on three  
98 sequencing platforms (Illumina MiSeq, Ion Torrent PGM, Ion Torrent S5). Two of these amplicon  
99 pools derived from the PCR of bulk DNA extracts (abdomen, leg) to test the impact of tissue  
100 type. Two other amplicon pools derived from DNA extracts of single legs that were analyzed by  
101 pooling prior to or after PCR. Finally, we examined species recovery for two amplicons of  
102 differing length on the S5. The overall analytical approach involved evaluation of the  
103 relationship between read depth and species recovery for these treatment variables.

104

## 105 **Material and Methods**

### 106 Assembly of Mock Community

107 We began the assembly of a mock community by obtaining COI sequences from 3,044  
108 insects collected in Malaise traps deployed near Cambridge, Ontario, Canada. A DNA extract

109 was prepared from a single leg from each specimen employing a membrane-based protocol  
110 (Ivanova et al. 2006). The 658 bp barcode region of COI was amplified and then Sanger  
111 sequenced, to link a haplotype to each individual specimen. Amplicons were generated using a  
112 primer cocktail of C\_LepFolF and C\_LepFolR (Hernández-Triana LM et al. 2014) with initial  
113 denaturation at 94 °C for 2 min followed by 5 cycles of denaturation for 40 s at 94 °C, annealing  
114 for 40 s at 45 °C and extension for 1 min at 72 °C; then 35 cycles of denaturation for 40 s at 94  
115 °C with annealing for 40 s at 51 °C and extension for 1 min at 72 °C; and a final extension for 5  
116 min at 72 °C (Ivanova et al. 2006; Hebert et al. 2018). Most reactions generated a 709 bp  
117 amplicon comprised of 658 bp of COI plus 51 bp of forward and reverse primers. A few  
118 amplicons were slightly shorter as a result of deletions in the COI gene. Unpurified PCR  
119 products were diluted 1:4 with ddH<sub>2</sub>O before 2 µl was used as the template for a cycle  
120 sequencing reaction. All products were sequenced following standard procedures on an ABI  
121 3730xl DNA Analyzer (Applied Biosystems, Foster City, California, USA).

122 Because some specimens could not be identified to a species level, we employed the  
123 Barcode Index Number (BIN) system which examines patterns of sequence variation at COI to  
124 assign each specimen to a persistent species proxy (Ratnasingham and Hebert 2013). The  
125 overall analysis provided sequence records for 803 BINs. From this total, we selected 374 BINs  
126 that met two criteria. They showed >2% COI sequence divergence from their nearest-neighbor,  
127 and they were taxonomically distant. The resulting mock community included representatives  
128 of 10 orders and 104 insect families. Supplemental Table 1 provides a list of the taxa included in  
129 the mock community as well as details on vouchers, their body size (as estimated by abdominal  
130 mass), and the GC content of their COI. Following selection of the specimens for inclusion in the

131 mock community, fresh DNA extracts were made following the four protocols described below,  
132 and the amplicon pools generated from them were subsequently analyzed on three sequencing  
133 platforms.

#### 134 Experimental design for metabarcoding analysis

135 Species recovery was compared for amplicon pools generated by four protocols (Figure  
136 1). Two involved the analysis of amplicons generated from bulk DNA extracts derived from two  
137 tissues (Bulk Abdomen, Bulk Leg). The other two treatments involved the initial extraction of  
138 DNA from individual legs. The resultant DNA extracts were either pooled prior to PCR to create  
139 the Composite Leg treatment or separately amplified and subsequently pooled to create the  
140 Single Leg treatment (Figure 1). Although the initial design called for the same specimens to be  
141 included in each mock community, this was not possible. The Composite Leg and Single Leg  
142 treatments did include the selected array of 374 BINs. However, five of their source specimens  
143 either lacked an abdomen or another leg for inclusion in the Bulk Abdomen or Bulk Leg  
144 treatments. As a result, five BINs, generally belonging to the same order as the excluded ones,  
145 were employed as replacements to maintain 374 BINs per treatment (BOLD:AAA2323,  
146 BOLD:AAA2632, BOLD:AAF4234, BOLD:AAP6354; BOLD:ABV1240). Further details on the  
147 treatments are available at the following DOIs: Bulk Abdomen and Bulk Leg:  
148 [dx.doi.org/10.5883/DS-NGS375A](https://dx.doi.org/10.5883/DS-NGS375A); Composite Leg and Single Leg: [dx.doi.org/10.5883/DS-](https://dx.doi.org/10.5883/DS-NGS375B)  
149 [NGS375B](https://dx.doi.org/10.5883/DS-NGS375B).

#### 150 Bulk DNA extractions and PCR



151 DNA extracts for the two bulk samples (Bulk Abdomen, Bulk Leg) were generated with a  
152 modified membrane-based protocol (Ivanova et al. 2006). Specifically, the bulk abdomens  
153 (combined mass = 1,062.8 mg) and bulk legs (combined mass = 30.9 mg) were lysed overnight  
154 in the same relative volume of insect lysis buffer (51.6 ml and 1.5 ml respectively), with 10  
155 mg/ml of Proteinase K (Invitrogen). Following lysis, a 100  $\mu$ l aliquot of each extract was mixed  
156 with 200  $\mu$ l of binding mix and transferred to an EconoSpin<sup>®</sup> column (Epoch Life Sciences)  
157 before centrifugation at 5000 g for 2 min. The DNA extracts were then purified with three wash  
158 steps. The first wash employed 300  $\mu$ l of protein wash buffer before centrifugation at 5000 g for  
159 2 min. Columns were then washed twice with 600  $\mu$ l of wash buffer before being centrifuged at  
160 5000 g for 4 minutes. Columns were transferred to clean tubes and spun dry at 10000 g for 4  
161 min to remove any leftover buffer, then transferred to clean collection tubes and incubated for  
162 30 min at 56°C to dry the membrane. DNA was subsequently eluted by adding 50  $\mu$ l of 10 mM  
163 Tris-HCl pH 8.0 followed by centrifugation at 10000 g for 5 min. All DNA extracts were  
164 normalized to 3 ng/ $\mu$ l prior to PCR. All PCR reactions were composed of 5% trehalose (Fluka  
165 Analytical), 1x Platinum Taq reaction buffer (Invitrogen), 2.5 mM MgCl<sub>2</sub> (Invitrogen), 0.1  $\mu$ M of  
166 each primer (Integrated DNA Technologies), 50  $\mu$ M of each dNTP (KAPA Biosystems), 0.15 units  
167 of Platinum Taq (Invitrogen), 1  $\mu$ l of template, and HyClone<sup>®</sup> ultra-pure water (Thermo  
168 Scientific) for a final volume of 6  $\mu$ l.

#### 169 Construction of HTS libraries

170 Two rounds of PCR were used to generate the amplicon libraries destined for sequence  
171 characterization on the three platforms. Most first-round reactions employed a primer cocktail  
172 targeting a 407 and 421 bp region of COI and will be referred to as the 407 bp amplicon

173 throughout the manuscript. The 407 bp region was amplified using MLepF1 (Hebert et al. 2004)  
174 and the 421 bp region with RonMWasp (Smith et al. 2012) as forward primers and LepR1  
175 (Hebert et al. 2004) and HCO2198 (Folmer et al. 1994) as reverse primers (Table S2). An  
176 alternate first-round PCR targeted a 463 bp amplicon of COI; it was generated with another  
177 forward primer — AncientLepF3 (Prosser et al. 2016) (Table S2). In addition, the primers  
178 employed to generate amplicons for MiSeq analysis contained a Nextera transposase adapter  
179 (Table S2). All first-round PCRs were run under the same conditions with initial denaturation of  
180 94 °C for 2 min, followed by 20 cycles of denaturation at 94°C for 40 s, annealing at 51°C for 1  
181 min and extension at 72 °C for 1 min, with a final extension at 72°C of 5 min. Three technical  
182 PCR replicates were generated for three of the treatments – Bulk Abdomen, Bulk Leg, and  
183 Composite Leg.

184 Prior to the second PCR, first-round products were diluted 2x with dd H<sub>2</sub>O. Fusion primers  
185 were used to attach platform-specific unique molecular identifiers (UMIs) along with  
186 sequencing adaptors for Ion Torrent libraries and a flow cell bind for the MiSeq libraries (Table  
187 S2). The second PCR was run under the same conditions as the first round for reactions slated  
188 for analysis on the Ion Torrent platforms, but the samples for Illumina were amplified following  
189 manufacturer's specifications with initial denaturation at 94°C for 2 min, then 20 cycles of  
190 denaturation at 94°C for 40 with annealing at 61°C for 1 min and extension at 72 °C for 1 min,  
191 followed by a final extension at 72°C of 5 min. Supplementary Table S2 provides all primer  
192 sequences and details on samples indexing.

193 For each platform, the UMI-labelled reaction products were pooled prior to sequencing.  
194 The sequence libraries for the S5 were prepared on an Ion Chef™ (Thermo Fisher Scientific)

195 following manufacturer's instructions while those for the PGM were prepared using the Ion  
196 PGM™ Hi-Q™ View OT2 400 Kit and the Ion PGM™ Hi-Q™ Sequencing Kit (Thermo Fisher  
197 Scientific). The PGM libraries were sequenced on a 318 v2 chip while the S5 libraries were  
198 sequenced on a 530 chip at the Canadian Centre for DNA Barcoding. Illumina libraries were  
199 sequenced (paired end) using the 300 bp reagent kit v3 on an Illumina MiSeq in the Genomics  
200 Facility of the Advanced Analysis Centre at the University of Guelph.

### 201 Bioinformatics and analysis

202 Prior to uploading MiSeq runs, read libraries were paired using the QIIME (Caporaso et al.  
203 2010) pair join script (join\_paired\_ends.py) with a minimum overlap of 20 bp and a maximum  
204 difference of 10%. All read libraries were uploaded to mBRAVE (<http://mbrave.net/>), an online  
205 platform for analyzing and visualizing metabarcoding data. The Quality Value (QV) of each  
206 sequence was evaluated and all records failing to meet any one of three quality standards were  
207 discarded: 1) mean QV<20; 2) >25% of bp with QV<20; 3) >5% of bp with QV<10. All reads were  
208 trimmed to be either 407 bp or 463 bp. Retained sequences were viewed as a match to a BIN in  
209 the custom Sanger reference library if their distance was <3% to any reference. All reads not  
210 matching a reference sequence were clustered at an OTU threshold of 2%. These OTUs were  
211 then queried against four other system libraries (insects, non-insect arthropods, non-arthropod  
212 invertebrates, bacteria). Standard analytical parameters were used for all treatments and  
213 sequencing platforms. All raw data is available in NCBI's Short Read Archive (SRP158933). The  
214 three replicates for the Bulk Abdomen, Bulk Leg, and Composite Leg treatments were pooled.

215 OTU tables for each run were merged in R ver 3.4.4 (R Core Team 2018). To compare BIN  
216 accumulation across all samples, we randomly subsampled each run at different read depths

217 for 10,000 replicates using a custom script (Supplemental material). To measure the BIN  
218 accumulation for each treatment, we compared the slopes between sequential points at eight  
219 read counts ( $10^2$ ,  $10^3$ ,  $10^{3.5}$ ,  $10^4$ ,  $10^{4.5}$ ,  $10^5$ ,  $10^{5.5}$ ,  $10^6$ ). Sequential points with a slope of less than  
220 0.01 were viewed as indicating that an asymptote had been achieved.

221 To compare the different treatments and sequencing platforms, we reduced the data set  
222 to the 369 shared BINs. Read distributions were visualized using the JAMP v0.44 package  
223 (<https://github.com/VascoElbrecht/JAMP>) in R to produce a heat map using the  
224 “OTU\_heatmap” function. Read distributions across BINs were compared using density graphs  
225 generated with ggplot2 v2.2.1 (Wickham 2009). The relative abundances of all BINs comprising  
226 greater than 0.01% of the overall reads were used to estimate Simpson’s index, Pielou’s mean  
227 evenness, and Renyi’s entropy implemented in the R package vegan v2.5-1 (Oksanen et al.  
228 2018). Compositional dissimilarity between replicates and treatments were examined using a  
229 dendrogram based on the Bray-Curtis index and calculated with vegan. The values for the Bray-  
230 Curtis index were also used to generate a non-metric multidimensional scaling (NMDS) with  
231 vegan.

232 The relationships between read counts and body size, as measured by abdominal mass,  
233 and the read count and GC content of the COI amplicon were examined using Kendall Tau  
234 correlations in R ver 3.4.4 (R Core Team 2018). An analysis of similarity (ANOSIM) with 999  
235 permutations was used to compare species recovery among treatment types, and sequencing  
236 platforms and between the two amplicons with the R package vegan v2.5-1 (Oksanen et al.  
237 2018). All custom scripts are available as supplementary materials.

238           The relationships between the read count for each BIN and primer mismatches were  
239 investigated for the 407 bp and 463 bp amplicons. The number of mismatches were quantified  
240 by counting the number of nucleotide substitutions between the primer sequence and the  
241 template DNA for each BIN. Information on the DNA sequence for the forward primer binding  
242 sites was available from the Sanger reads for all 369 BINs. Calculation of mismatches was  
243 straightforward for the 463 bp amplicon as it involved a single forward primer. As the 407 bp  
244 amplicon was generated with two different forward primers, total mismatches were quantified  
245 based upon the forward primer with the best match to the template for each BIN. The same  
246 two reverse primers were employed to generate the 407 bp and 463 bp amplicons, requiring a  
247 similar approach, but with the complication that DNA sequence information for template DNA  
248 was not available from the Sanger sequence (as it was based on amplicons generated with the  
249 same reverse primers). As a result, a new reverse primer was employed to extend the sequence  
250 in a 3' direction, an approach which delivered the desired sequence information for 203 of the  
251 369 BINs. As a consequence, it was possible to examine the relationship between read counts  
252 and the number of mismatches between template and forward primer for all 369 BINs and for  
253 the total mismatch count for the forward and reverse primers for the 203 BINs with template  
254 sequences for both regions.

## 255 **Results**

### 256 Run quality

257           We first compared the output and quality of the reads from the HTS platforms. The S5  
258 and MiSeq generated a similar number of reads (~ 1 million per replicate), while the PGM  
259 generated substantially fewer. About 60-65% of the MiSeq reads were filtered during merging

260 of the paired-end reads, but subsequent filtering was minimal (< 1%). The PGM and S5  
261 encountered a similar loss of reads as 45–50% of the raw reads were filtered (Table 1). The  
262 MiSeq reads showed more length consistency and higher quality than those from both Ion  
263 platforms, reflecting their near consistent QV versus the decline towards the 3' end of the PGM  
264 and S5 reads (Figure S1).

### 265 Read depth

266 Rarefaction curves were calculated for each of the four treatments and their technical  
267 replicates to ascertain if read depths were sufficient to recover all BINs (Figure 2). Although BIN  
268 recovery was high in all cases, the Single Leg treatment reached it with far fewer reads of the  
269 407 bp amplicon than the other treatments ( $10^{4-4.5}$  versus  $10^{4.5-5}$  –Table S3). There was  
270 evidence of variation among platforms as the PGM needed more reads to achieve an  
271 asymptote than the S5 or MiSeq. BIN accumulation curves for the other treatments were  
272 similar, but the Bulk Abdomen showed a small, but consistent outperformance of the Bulk Leg  
273 and Composite Leg treatments. The target amplicon also had a substantial impact as just  $10^{3.5}$   
274 reads of the 463 bp amplicon were required for the Single Leg treatment to reach its asymptote  
275 (Table S3). The technical replicates showed little divergence on all platforms; they had similar  
276 BIN recovery, similar mean read counts per BIN, and similar coefficients of variation (Table S1).  
277 Pielou's evenness, Simpson's Index, Inverse Simpson's Index, Renyi's diversity, and Shannon  
278 Indices were also similar across treatments on all platforms (Table 2; Figure S2). Finally, density  
279 plots were similar among technical replicates for all treatments and platforms suggesting that  
280 different HTS platforms produced similar results for the different treatments (Figure 1; Figure  
281 S3).

282

283

284 BIN recovery

285         When the criterion for BIN recovery was set at one or more reads, all platforms recovered  
286 >98% of the BINs but only the Single Leg treatment recovered all of them (Figure 4). Differences  
287 in recovery success among treatments were greater when the criterion for recovery was set at  
288 >0.01% of the reads. Under this criterion, the Single Leg treatment recovered >92.5% of the  
289 BINs versus 83-89% for the Bulk Abdomen treatment and about 76-83% for the Composite Leg  
290 and Bulk Leg treatments (Table 1). The greater evenness in read count for the Single Leg  
291 treatment was striking; it led to lower coefficients of variation, higher diversity indices, and  
292 Pielou's evenness (Table 2; Figure 4; Figure S2). Density plots of read abundance also  
293 demonstrated much higher evenness for the Single Leg treatment, especially for the 407 bp  
294 amplicon on the MiSeq and for the 463 bp amplicon on the S5 (Figure S3). These differences  
295 were also reflected in BIN recovery, Pielou's evenness, and diversity indices (Table 2; Table S2).

296 BIN abundances

297         Because a single specimen of each BIN was included in the mock community, the  
298 proportion of sequences from each should, in the absence of bias, be similar across sequencing  
299 platforms, amplicons, and treatments. In practice, the relative abundances of the BINs varied  
300 markedly. A single-link dendrogram based on Bray-Curtis dissimilarity values indicated that  
301 samples clustered first by treatment, next by amplicon length, and finally by sequencing  
302 platform (Figure 3A). An analysis of similarity using Bray-Curtis distances affirmed significant

303 differences in BIN abundances by treatment type ( $p = 0.001$ ,  $R = 1$ ), amplicon length ( $p = 0.027$ ,  
304  $R = 0.17$ ), but not by sequencing platform ( $p = 0.13$ ,  $R = 0.037$ ) (Figure 3B; Figure S5).

### 305 Primer mismatches and read count

306 Examination of the relationship between the read count for each of the 369 BINs and its  
307 number of mismatches from the forward primer revealed a strong negative relationship. BINs  
308 with a high mismatch count were typically represented by few reads. For example, very few  
309 sequences were recovered from the only BIN belonging to the order Dermoptera and this was  
310 associated with a high Mismatch Index from the forward primers for the 407 bp and 463 bp  
311 amplicons. BIN recovery was substantially higher for the 463 bp amplicon than for the 407 bp  
312 amplicon (Table 2; Figure S2). Its superior performance was associated with the fact that its  
313 forward primer showed a better match to the DNA extracts. Just 18 BINs had >3 mismatches for  
314 the forward primer used to amplify the 463 bp amplicon versus 62 for the forward primer for  
315 the 407 bp amplicon (Table S1 and Table S4). The impact of these mismatches was clear; mean  
316 read depth and relative abundance of BINs declined after two mismatches for the Bulk  
317 Abdomen, Bulk Leg, and Composite Leg treatments and after four mismatches for the Single  
318 Leg. When we examined the impact of forward and reverse primer mismatches for a subset of  
319 203 BINs, mean read depth and relative abundance showed a significant decline after four  
320 mismatches for the Bulk Abdomen, Bulk Leg, and Composite Leg treatments and after seven for  
321 the Single Leg. Kruskal-Wallis tests showed that read depth declined significantly with an  
322 increasing number of primer mismatches for the forward primers for both the 463 bp and 407  
323 bp amplicons ( $p < 0.0001$ ) and for the summed primer mismatches (5' + 3') for the subset of  
324 203 BINs ( $p < 0.0001$ ).



325

326 Impacts of biomass and nucleotide composition on read count

327 Other factors were also responsible for some of the variation in read counts among BINs.  
328 There was, for example, a weak negative correlation between the GC content of an amplicon  
329 and its read count, although all values were low ( $r^2 < 0.1$ ) excepting the Single Leg treatment on  
330 the MiSeq ( $r^2 = 0.32$ ). A weak positive correlation ( $r^2 = 0.24 - 0.28$ ) was also apparent between  
331 the abdominal mass of a BIN and its read count on all platforms.

332 Non-Target Sequences

333 Every run recovered some sequences with substantial sequence divergence from the  
334 Sanger reference library (Table 1). The incidence of these non-target sequences for the 407 bp  
335 amplicon was slightly lower (4 – 6%) on the PGM and S5 platforms than on the MiSeq (8 – 10%).  
336 Interestingly, the 463 bp amplicon had substantially more non-target reads (15 – 17%). Many of  
337 the non-target reads were chimeras (8 – 81 %; Table 1). After their exclusion, most sequences  
338 assigned to an OTU did not find a match to a sequence in the supplemental libraries. Of those  
339 that did, similar numbers matched to a known bacterial sequence or to another arthropod.

340 Taxonomic Bias

341 There was also evidence of taxonomic bias in the read counts for BINs between the two  
342 amplicons. For example, Orthoptera, Lepidoptera, and Diptera dominated the 407 bp  
343 sequences from the Bulk Abdomen and Bulk Leg treatments while Lepidoptera, Mecoptera,  
344 Diptera, and Coleoptera dominated the 463 bp amplicon (Table S5). The 463 bp amplicon also  
345 showed more variation among treatments than the 407 bp amplicon (Table S5). Few sequences

346 were recovered for Dermaptera, especially for the 407 bp amplicon, likely reflecting its  
347 possession of 5 mismatches from the forward primer (Table S1). Among the bulk samples,  
348 relative abundance differed among treatments. For example, the relative abundance of  
349 Lepidoptera and Mecoptera was lower, while Diptera and Orthoptera were higher in the  
350 Composite Leg than in the Bulk Leg and Bulk Abdomen treatments. The proportion of read  
351 counts for Trichoptera showed particularly large variation, being 5–25X higher for the Bulk Leg  
352 than the Bulk Abdomen and Composite Leg treatments across all platforms and for both  
353 amplicons.

## 354 **Discussion**

355 Metabarcoding is a powerful tool for characterizing biodiversity patterns (Cristescu 2014),  
356 but data interpretation is complicated by several factors. PCR amplification bias and variation in  
357 the copy number of template DNA from the source specimens not only make it impossible to  
358 estimate abundances, but can impede the recovery of all species (Yu et al. 2012; Li et al. 2013;  
359 Beng et al. 2016). Although prior studies have revealed these complexities, there has been  
360 limited evaluation of the strength of their influence on interpretations of taxon diversity. To  
361 address this gap, the present study has examined the impacts of diverse factors including  
362 source DNA, PCR primers, sequencing platform, and sequencing depth on species recovery from  
363 a mock community of arthropods.

### 364 Sequencing Depth

365 Variation in sequencing depth (read count) can directly impact taxon recovery and hence  
366 perceived diversity patterns. This is particularly true for comparisons among datasets with

367 differing read counts (Leray et al. 2015; Leray and Knowlton 2017; Elbrecht et al. 2017). Low  
368 read depth typically means that some rare species with little biomass in a community will be  
369 overlooked, leading to underestimation of alpha diversity. When taxon counts are incomplete,  
370 comparisons among sites are also compromised (Bellemain et al. 2012; Sickie et al. 2015;  
371 Yamamoto et al. 2017), producing overestimates of beta diversity (Sickie et al. 2015). Both  
372 rarefaction and species accumulation curves are valuable for ascertaining if sequencing depth  
373 has been adequate. When sequences have been recovered from all species, the slope of the  
374 rarefaction curve is zero, providing a simple criterion for gauging the adequacy of read coverage  
375 (Lanzen et al. 2017). In real world situations, the true species count is unknown and increased  
376 sampling effort nearly always raises the species count, meaning there is no asymptote.  
377 Although taxon richness was fixed in our study, we employed a slope of 0.01 as the criterion for  
378 assessing when taxon diversity had achieved an asymptote as this approach can be employed in  
379 studies on natural communities. Under this criterion, there were substantial differences among  
380 the four treatments and between primer sets.

381         Analysis of BIN accumulation curves indicated that read depth was sufficient for all four  
382 treatments to achieve a slope of 0.01. However, the Single Leg treatment reached this value  
383 with much lower read depth than the bulk samples due to its relative protection from the  
384 impacts of PCR bias (Nichols et al. 2017; Pan et al. 2014, Dabney and Meyer 2012; Elbrecht and  
385 Leese 2015). Interestingly, the other three treatments showed similar BIN accumulation curves  
386 on all three sequence platforms, suggesting shared factors are constraining BIN recovery.

387 Sequencing Platforms

388           The three sequencing platforms generated similar estimates of BIN diversity. However,  
389 results from the MiSeq had advantages over those from the PGM and S5. Its paired end  
390 protocol consistently recovered sequences for the full 407 bp amplicon, which can be a  
391 requirement for clustering algorithms and is also useful for haplotype analysis (Elbrecht et al.  
392 2018), while those from the other platforms were often truncated. Its reads also possessed  
393 fewer indels than those from PGM and S5. Finally, the MiSeq reads had consistently higher QV  
394 across the amplicon. Because these factors simplified data analysis (Mardis et al. 2013; Edgar et  
395 al. 2013) and sequencing costs were similar, the MiSeq is currently the best platform for  
396 metabarcoding (Mardis 2013). However, because it cannot analyze amplicons longer than 500  
397 bp, third-generation sequencing platforms (Tedersoo et al. 2018; Hebert et al. 2018; Wilkinson  
398 et al. 2017) will be an attractive option if their current limitations on read number (Pacific  
399 Biosciences) and quality (Oxford Nanopore) are overcome.

#### 400 Impacts of Analytical Protocols

401           Our four treatments made it possible to compare the impact of targeting different tissues,  
402 employing different DNA extraction regimes, and using different PCR protocols. Despite their  
403 similar tissue input and DNA extraction regime, the Single Leg treatment achieved asymptotic  
404 diversity much more rapidly than the Composite Leg treatment, indicating how separate PCR  
405 reactions reduce amplification bias. By contrast, BIN accumulation curves for the Composite Leg  
406 treatment were similar to those for the Bulk Leg and Bulk Abdomen, indicating that DNA  
407 extraction was equally effective whether carried out on single specimens or on bulk samples.  
408 Comparison of the results for the bulk/composite samples did reveal more nuanced differences  
409 as they showed the number of reads for particular taxa varied among these three treatments

410 despite similar BIN recovery profiles. These differences likely stem from differential  
411 leg/abdomen mass ratios among species which varied the mitochondrial copy number for the  
412 component species among treatments. Certainly, mitochondrial copy number varies among  
413 tissues and among species (Veltri et al. 1990; Cole 2016). Future efforts to explore this  
414 relationship and its importance to metabarcoding studies must quantify copy number  
415 differences between tissues and species. In the absence of such information, copy number bias  
416 can be reduced by partitioning the specimens in a bulk sample into a few size fractions  
417 (Elbrecht et al. 2017A; Vivien et al. 2016).

418 Variation in read counts for the taxa in any bulk sample are also influenced by primer  
419 bias. In this study, these effects were indicated by the linkage between the read counts for each  
420 BIN and the number of mismatches between its COI sequence and the primer set. Although  
421 degenerate primers (Yu et al. 2012; Elbrecht and Leese 2017; Moriniere et al. 2016) and  
422 improved primer sets (Clarke et al. 2014; Leray and Knowlton 2017; Elbrecht and Leese 2017)  
423 can reduce such bias, they cannot conquer the problem unless all target species possess  
424 identical sequences for the primer binding sites, a condition that will never be satisfied for a  
425 large assemblage. However, efforts to target highly conserved regions can improve the  
426 situation. For example, the BIN accumulation curve reached its asymptote with much lower  
427 read coverage for the 463 bp than the 407 bp amplicon. More effort is needed to develop  
428 better primer sets by testing their performance on a breadth of taxa and to minimize  
429 mismatches by sorting samples into taxonomic groups (Moriniere et al. 2016; Bellemaine et al.  
430 2012; Cristescu 2014; Tedersoo et al. 2015). Efforts to minimize specimen bias should include  
431 mass and taxonomic sorting to reduce differences in template DNA quantity between

432 specimens (Elbrecht et al. 2017A; Moriniere et al. 2016; Vivien et al. 2016). Currently, the only  
433 means to circumvent biases is to process specimens individually (e.g. Single Leg treatment),  
434 which is so time consuming and costly that it is difficult to implement for large biodiversity  
435 surveys (Ji. et al 2013).

#### 436 BIN recovery

437 Most of the 369 BINs in the template pools were recovered in all four treatments. However,  
438 this outcome shifts if recovery success is defined as those BINs comprising at least 0.01% of the  
439 read count, a criterion often employed to minimize the impacts of sequencing errors, chimeras,  
440 and contaminants (Leray and Knowlton 2017). Under this criterion, BIN recovery was high (>  
441 92.5%) for the Single Leg treatment, but substantially lower (76% – 89%) for the other three.  
442 Interestingly, the Bulk Abdomen treatment showed higher BIN recovery than the Bulk Leg and  
443 Composite Leg treatments, perhaps reflecting more similar mitochondrial copy numbers among  
444 abdomens than legs (Veltri et al. 1990; Cole 2016). As expected, BIN recovery was higher for the  
445 463 bp than the 407 bp amplicon.

#### 446 False positives and negatives

447 Up to 26 of all BINs failed to achieve a 0.01% read abundance in the bulk and composite  
448 treatments meaning they would often be excluded during analysis, creating false negatives that  
449 would underestimate alpha diversity. As in other metabarcoding studies (Vivien et al. 2016;  
450 Ficetola et al 2014; Brandon-Mong et al. 2015; Port et al. 2015), false positives were also  
451 encountered, likely reflecting eDNA associated with specimens, contamination during sample  
452 processing (Port et al. 2015) or NUMTs (Song et al. 2008). Their impact can be reduced by

453 employing curated reference libraries to both recognize sequences derived from known species  
454 and to exclude paralogs and pseudogenes (Hebert et al. 2003; Landi et al. 2014; Zimmerman et  
455 al. 2014; Braukmann et al. 2017; Bergsten et al. 2014). In addition, the use of negative controls  
456 is an effective way to evaluate the incidence of contaminants introduced during sample  
457 processing (Port et al. 2015).

## 458 Conclusions

459 This study has examined the complexities encountered in evaluating the species  
460 composition of a mock community comprised of 374 species of arthropods. Some results were  
461 reassuring. Similar measures of overall taxon diversity were obtained from different sequencing  
462 platforms, from different tissues, from different DNA extraction protocols, and from different  
463 PCR primers. However, this congruence needs to be qualified. Firstly, this study has shown that  
464 the analytical effort required to obtain comprehensive information on species composition  
465 through the analysis of bulk samples is far higher than that required to obtain the same  
466 information through specimen-based protocols. For example, the Sanger sequencing of 369  
467 specimens would deliver precise information on the species composition and abundance of  
468 each sample. By comparison, the recovery of a complete species list by sequencing a merged  
469 pool of amplicons following separate extraction and PCR (e.g. Single Leg treatment) required  
470 60,000 reads. When samples were pooled prior to PCR, the recovery of a near-complete species  
471 list required at least 250,000 reads, and the proportion of the taxa recovered were represented  
472 by so few reads (<0.01%) that they could be excluded during data cleansing. It is worth  
473 emphasizing that many natural communities present greater analytical complexity than the  
474 mock assemblage examined in this study – they include more species and the abundances of

475 these species show great variation. Given these complications, it is clear that community  
476 characterization through metabarcoding will often require both intensive sequencing effort and  
477 improved approaches to discriminate between those low frequency reads that are spurious and  
478 those that derive from rare species.

#### 479 **Acknowledgements**

480 We thank the lab and collections staff at the Centre for Biodiversity Genomics for aiding  
481 in acquiring and processing the specimens in this study and Suzanne Bateson for aid with  
482 graphics. We are also grateful to Jenna Quinn and other staff at the rare Charitable Research  
483 Reserve for facilitating the collection of specimens. This study was enabled by support from the  
484 Ontario Ministry of Research, Innovation and Science and from the Canada First Research  
485 Excellence Fund to the 'Food From Thought' research program.



## 486 References

- 487 Aas AB, Davey ML, and H Kauserud. (2017). ITS all right mama: investigating the formation of  
488 chimeric sequences in the ITS2 region by DNA metabarcoding analyses of fungal mock  
489 communities of different complexities. *Molecular Ecology Resources*, 17, 730-741 DOI:  
490 10.1111/1755-0998.12622
- 491 Bassett Y, Cizek L, Cuénoud P, Didham RK, Guilhaumon F, Missa O, Novotny V, Ødegard F, Roslin  
492 T, Schmidt J, Tishechkin AK, Winchester NN, Roubik DW, Aberlenc H-P, Bail J, Barrios H,  
493 Bridle JR, Castaño-Meneses G, Corbara B, Curletti G, da Rocha WD, De Bakker D, Delabie JHC,  
494 Dejean A, Fagan LL, Floren A, Kitching RL, Medianero E, Miller SE, de Oliveira EG, Orivel J,  
495 Pollet M, Rapp M, Ribeiro SP, Roisin Y, Schmidt JB, Sørensen L, and M Leponce. (2012).  
496 Arthropod diversity in a tropical forest. *Science*, 338, 1481-1484
- 497 Bellemain E, Davey ML, Kauserud H, Epp LS, Boessonkool S, Coissac E, Geml J, Edwards M,  
498 Willerslev E, Gussarova G, Taberlet P, and C Brochmann. (2012). Fungal palaeodiversity  
499 revealed using high-throughput metabarcoding of ancient DNA from arctic permafrost.  
500 *Environmental Microbiology*, 15, 1176-1189 DOI: 10.1111/1462.29220.12020
- 501 Beng KC, Tomlinson KW, Shen XH, Surget-Goba Y, Hughes AC, Corlett RT, and JWF Slik. (2016).  
502 The utility of DNA metabarcoding for studying the response of arthropod diversity and  
503 composition to land-use change in the tropics. *Scientific Reports*, 6, 24965 DOI:  
504 10.1038/srep24965
- 505 Bergsten J, Bilton DT, Fujisawa T, Elliott M, Monaghan MT, Balke M, Hendrich L, Geijer J,  
506 Herrmann J, Foster GN, Ribera I, Nilsson AN, Barraclough TG, and AP Vogler. (2014). The  
507 effect of geographical scale of sampling on DNA barcoding. *Systematic Biology*, 61, 851-869  
508 DOI: 10.1093/sysbio/sys037
- 509 Brandon-Mong GJ, Gan HM, Sing KW, Lee PS, Lim PE, and JJ Wilson. (2015). DNA metabarcoding  
510 of insects and allies: an evaluation of primers and pipelines. *Bulletin of Entomological*  
511 *Research*, 105, 717-727 DOI: 10.1017/S0007485315000681
- 512 Braukmann TWA, Kuzmina ML, Sills J, Zakharov EV, and PDN Hebert. (2017). Testing the efficacy  
513 of DNA barcodes for identifying the vascular plants of Canada. *PLoS ONE*, 12, E0169515 DOI:  
514 10.1371/journal.pone.0169515
- 515 Caporaso JG, Kuczynski J, Stombaugh J, Bittinger K, Bushman FD, Costello EK, Fierer N, Pena AG,  
516 Goodrich JK, Gordon JI, Huttley GA, Kelley ST, Knights D, Koenig JE, Ley RE, Lozupone CA,  
517 McDonald D, Muegge BD, Pirrung M, Reeder J, Sevinsky JR, Turnbaugh PJ, Walters WA,  
518 Widmann J, Yatsunenko T, Zaneveld J, and R Knight. (2010). QIIME allows analysis of high-  
519 throughput community sequencing data. *Nature Methods*, 7, 335-336 DOI:  
520 10.1038/nmeth.f.303

- 521 Clarke LJ, Soubrier J, Weyrich LS, and A Cooper. (2014). Environmental metabarcodes for  
522 insects: in silico PCR reveals potential for taxonomic bias. *Molecular Ecology Resources*, 14,  
523 1160-1170 DOI: 10.1111/1755-0998.12265
- 524 Cole LW. (2016). The evolution of per-cell organelle number. *Frontiers in Cell and*  
525 *Developmental Biology*, 4, 85 DOI: 10.3389/fcell.2016.00085
- 526 Cristescu ME. (2014). From barcoding single individuals to metabarcoding biological  
527 communities: towards an integrative approach to the study of global biodiversity. *Trends in*  
528 *Ecology and Evolution*, 29, 566-571
- 529 Dabney J and M Meyer. (2012). Length and GC-biases during sequencing library amplification: a  
530 comparison of various polymerase-buffer systems with ancient and modern DNA sequencing  
531 libraries. *Biotechniques*, 52, 87-94 DOI: 10.2144/000113809
- 532 Divoll TJ, Brown VA, Kinne J, McCracken GF, and JM O'Keefe. (2018). Disparities in second-  
533 generation DNA metabarcoding results exposed with accessible and repeatable workflows.  
534 *Molecular Ecology Resources*, 18, 590-601
- 535 Edgar RC. (2013). UPARSE: highly accurate OTU sequences from microbial amplicon reads.  
536 *Nature Methods*, 10, 996-998 DOI: 10.1038/nmeth.2604
- 537 Elbrecht V and F Leese. (2015). Can DNA-based ecosystem assessments quantify species  
538 abundance? testing primer bias and biomass-sequence relationships with an innovative  
539 metabarcoding protocol. *PLoS ONE*, 10, e0130324 DOI: 10.1371/journal.pone.0130324
- 540 Elbrecht V, Taberlet P, Dejean T, Valentini A, Usseglio-Polatera P, Beisel J-N, Coissac E, Boyer F,  
541 and F Leese. (2016). Testing the potential of a ribosomal 16S marker for DNA metabarcoding  
542 of insects. *PeerJ*, 4, e1966 DOI: 10.7717/PeerJ.1966
- 543 Elbrecht V, and F Leese. (2017). Validation and development of freshwater invertebrate  
544 metabarcoding COI primers for Environmental Impact Assessment. *Frontiers in*  
545 *Environmental Science*, 5, 1–11. DOI: 10.3389/fenvs.2017.00011
- 546 Elbrecht V, Peinert B, and F Leese. (2017A). Sorting things out: Assessing effects of unequal  
547 specimen biomass on DNA metabarcoding. *Ecology and Evolution*, 7, 6918-6926 DOI:  
548 10.1002/ece3.3192
- 549 Elbrecht V, Vamos EE, Meissner K, Aroviita J, and F Leese. (2017B). Assessing strengths and  
550 weaknesses of DNA metabarcoding-based macroinvertebrate identification four routine  
551 stream monitoring. *Methods in Ecology and Evolution*, 8, 1265-1275 DOI: 10.1111/2041-  
552 210X.12789
- 553 Elbrecht V, Varnos EE, Steinke D, and F Leese. (2018). Estimating intraspecific genetic diversity  
554 from community DNA metabarcoding data. *PeerJ*, 6, e4644 DOI: 10.7717/PeerJ.4644
- 555 Ficetola GF, Pansu J, Bonin A, Cossiac E, Giguët-Covex C, De Barba M, Gielly L, Lopes CM, Boyer  
556 F, Raye FPG, and P Taberlet. (2015). Replication levels, false presences, and the estimation of

- 557 the presence/absence from eDNA metabarcoding data. *Molecular Ecology Resources*, 15,  
558 543-556 DOI: 10.1111/1755-0998.12338
- 559 Folmer O, Black M, Hoeh W, Lutz R, and R Vrijenhoek. (1994). DNA primers for amplification of  
560 mitochondrial cytochrome c oxidase subunit I from diverse metazoan invertebrates.  
561 *Molecular Marine Biology and Biotechnology*, 3, 294–299
- 562 Hajibabaei M, Ivanova NV, Ratnasingham S, Dooh RT, Kirk SL, Mackie PM, and PDN Hebert.  
563 (2005). Critical factors for assembling a high volume of DNA barcodes. *Philosophical*  
564 *Transactions of the Royal Society of London B: Biological Sciences*, 360, 1959-1967
- 565 Hajibabaei M, Shokralla S, Zhou S, Singer GAC, and DJ Baird. (2011). Environmental barcoding: a  
566 next-generation sequencing approach for biomonitoring applications using river benthos.  
567 *PLoS ONE*, 6, e17497 DOI: 10.1371/journal.pone.0017497
- 568 Hebert PDN, Cywinska A, Ball SL, and JR deWaard. (2003). Biological identifications through  
569 DNA barcodes. *Proceedings of the Royal Society B: Biological Science*, 270, 313-321 DOI:  
570 10.1098/rspb.2002.2218
- 571 Hebert PDN, Penton EH, Burns JM, Janzen DH, Hallwachs W. (2004). Ten species in one: DNA  
572 barcoding reveals cryptic species in the neotropical skipper butterfly *Astrartes fulgurator*.  
573 *Proceedings of the National Academy of Sciences of the United States of America*, 101,  
574 14812-14817
- 575 Hebert PDN and TR Gregory. (2005). The promise of DNA barcoding for taxonomy. *Systematic*  
576 *Biology*, 54, 852-859 DOI: 10.1080/10635150500354886
- 577 Hebert PDN, Braukmann TWA, Prosser SWJ, Ratnasingham S, deWaard JR, Ivanova NV, Janzen  
578 DH, Hallwach W, Naik S, Sones JE, and EV Zakharov. (2018). A Sequel to Sanger: Amplicon  
579 sequencing that scales. *BMC Bioinformatics*, 19, 219 DOI: 10.1186/s12864-018-4611-3
- 580 Hernández-Triana LM, Prosser SW, Rodríguez-Perez MA, Chaverri LG, Hebert PDN, and TR  
581 Gregory. (2014). Recovery of DNA barcodes from blackfly museum specimens (Diptera:  
582 Simuliidae) using primer sets that target a variety of sequence lengths. *Molecular Ecology*  
583 *Resources*, 14, 508–18 DOI: 10.1111/1755-0998.12208
- 584 Ivanova NV, deWaard JR, and PDN Hebert. 2006. An inexpensive, automation friendly protocol  
585 for recovering high quality DNA. *Molecular Ecology Notes*, 6, 998-1002
- 586 Ji Y, Ashton L, Pedley SM, Edwards DP, Tang Y, Nakamura A, Kiching R, Dolman PM, Woodcock  
587 P, Edwards FA, Larsen TH, Hsu WW, Benedick S, Hamer KC, Wilcove DS, Bruce C, Wang X,  
588 Levi T, Lott M, Emerson BC, and DW Yu. (2013). Reliable, verifiable, and efficient monitoring  
589 of biodiversity via metabarcoding. *Ecology Letters*, 16, 1245-1257
- 590 Landi M, Dimech M, Arculeo M, Biondo G, Martins R, Carneiro M, Carvalho GR, Brutto SL, and  
591 FO Costa. (2014). DNA barcoding for species assignment: The case of Mediterranean marine  
592 fishes. *PLoS ONE*, 9, e106135 DOI: 10.1371/journal.pone.0106135

- 593 Lanzen A, Lejang K, Jonassen I, Thompson EM, and C Troedsson. (2017). DNA extraction  
594 replicates improve diversity and compositional dissimilarity in metabarcoding of eukaryotes  
595 in marine sediments. *PLoS ONE*, 12, e0179443 DOI: 10.1371/journal.pone.0179443
- 596 Lee DF, Lu J, Chang S, Loparo JJ, and XS Xie. (2016). Mapping DNA polymerase error by single  
597 molecule sequencing. *Nucleic Acids Research*, 44, e118
- 598 Leray M, and N Knowlton. (2015). DNA barcoding and metabarcoding of standardized samples  
599 reveal patterns of marine benthic diversity. *Proceedings of the National Academy of Sciences*  
600 *of the United States of America*, 112, 2076-2081
- 601 Leray M, and N Knowlton. (2017). Random sampling causes the low reproducibility of rare  
602 eukaryotic OTUs in Illumina COI metabarcoding. *PeerJ*, 5, e3006
- 603 Macher JN, Vivancos A, Piggott JJ, Centeno FC, Matthaei CD, and F Leese. (2018). Comparison of  
604 environmental DNA and bulk-sample metabarcoding using highly degenerate COI primers.  
605 *Molecular Ecology Resources* DOI: 10.1111/1755-0998.12940
- 606 Mardis ER. (2013). Next-generation sequencing platforms. *Annual Review of Analytical*  
607 *Chemistry*, 6, 287-303 DOI: 10.1146/annurev-anchem-062012-092628
- 608 Medeiros MJ, Eiben JA, Haines WP, Kaholoaa RL, King CBA, Krushekcnky PD, Magnacca KN,  
609 Rubinoff D, Starr F, and K Starr. (2013). The importance of insect monitoring to conservation  
610 actions in Hawaii. *Proceedings of the Hawaiian Entomological Society*, 45, 149-166
- 611 Moriniere J, de Araujo BC, Lam AW, Hausmann A, Balke M, Schmidt S, Hendrich L, Docxkal D,  
612 Fartmann B, Arvidsson S, and G Haszpruar. (2016). Species identification in Malaise trap  
613 samples by DNA barcoding based on NGS technologies and a scoring matrix. *PLoS ONE*, 11,  
614 e0155497 DOI: 10.1371/journal.pone.0155497
- 615 Nichols RV, Vollmers C, Newsom LA, Wang Y, Heintzman PD, Leighton M, Green RE, and B  
616 Shapiro. (2018). Minimizing polymerase biases in metabarcoding. *Molecular Ecology*  
617 *Resources*, 18, 927-939
- 618 Oksanen J, Blanchet FG, Friendly M, Kindt R, Legendre P, McGlenn D, Minchin PR, O'Hara RB,  
619 Simpson GL, Solymos P, Stevens MHH, Szoecs E and H Wagner. (2018). Vegan: Community  
620 Ecology Package. R package version 2.5-1. <https://CRAN.R-project.org/package=vegan>
- 621 Pan W, Byrne-Steele M, Wang C, Lu S, Clemmons S, Zahorchak RJ, J Han. (2014). DNA  
622 polymerase preference determines PCR priming efficiency. *BMC Biotechnology*, 14, 10 DOI:  
623 10.1186/1472-6750-14-10
- 624 Pimm SL, Jenkins CN, Abell R, Brooks TM, Gittleman JL, Joppa LN, Raven PH, Roberts M, and JO  
625 Sexton. (2014). The biodiversity of species and their rates of extinction, distribution, and  
626 protection. *Science*, 344, 1246752 DOI:10.1126/science.1246752

- 627 Piñol J, Mir G, Gomez-Polo P, and N Agustí. (2015). Universal and blocking primer mismatches  
628 limit the use of high-throughput DNA sequencing for the quantitative metabarcoding of  
629 arthropods. *Molecular Ecology Resources*, 15, 819-830 DOI: 10.1111 /1755-0998.12355
- 630 Port JA, O'Donnell JL, Romero-Maraccini OC, Leary PR, Litvin SY, Nickols KJ, Yamahara KM, and  
631 RP Kelly. (2016). Assessing vertebrate biodiversity in a kelp forest ecosystem using  
632 environmental DNA. *Molecular Ecology*, 25, 527-541 DOI: 10.1111/mec.13481
- 633 Potapov V and JL Ong. (2017). Examining sources of error in PCR by single molecule sequencing.  
634 *PLoS One*, 12, e0169774
- 635 Prosser SWJ, deWaard JR, Miller SE, and PDN Hebert. (2016). DNA barcodes from century-old  
636 type specimens using next-generation sequencing. *Molecular Ecology Resources*, 16: 487-  
637 497 DOI: 10.1111/1755-0998.12474
- 638 R Core Team (2018). R: A language and environment for statistical computing. R Foundation for  
639 Statistical Computing, Vienna, Austria. URL <https://www.R-project.org/>
- 640 Ratnasingham S and PDN Hebert. (2013). A DNA-based registry for all animal species: the  
641 barcode index number (BIN) system. *PLoS ONE*, 8, e66213 DOI:  
642 10.1371/journal.pone.0066213
- 643 Russo L, Stehouwer R, Heberling JM, and K Shea. (2011). The composite insect trap: an  
644 innovative combination trap for biologically diverse sampling. *PLoS ONE*, 26, e21079 DOI:  
645 10.1371/journal.pone.0021079
- 646 Salipante SJ, Kawashima T, Rosenthal C, Hoogestraat DR, Cummings LA, Sengupta DJ, Harkins  
647 TT, Cookson BT, and NG Hoffman. (2014). Performance comparison of Illumina and ion  
648 torrent next-generation sequencing platforms for 16S rRNA-based bacterial community  
649 profiling. *Applied and Environmental Microbiology*, 80, 7583–7591. DOI:  
650 10.1128/AEM.02206-14
- 651 Sato H, Sogo Y, Doi H, and H Yamanaka. (2017). Usefulness and limitations of sample pooling for  
652 environmental DNA metabarcoding of freshwater fish communities. *Scientific Reports*, 7,  
653 14860 DOI: 10.1038/s41598-017-14978-6
- 654 Shokralla S, Porter TM, Gibson JF, Dobosz R, Janzen DH, Hallwachs W, Golding GB, and M  
655 Hajibabaei. (2015). Massively parallel multiplex DNA sequencing for specimen identification  
656 using an Illumina MiSeq platform. *Scientific Reports*, 5, 9687 DOI: 10.1038/srep09687
- 657 Sickle W, Ankenbrand MJ, Grimmer G, Holzschuh A, Hartel S, Lanzen J, Steffan-Dewenter I, and  
658 A Keller. (2015). Increased efficiency in identifying mixed pollen samples by meta-barcoding  
659 with a dual-indexing approach. *BMC Ecology*, 15, 20 DOI: 10.1186/s12898-015-0051-y
- 660 Smith MA, Bertrand C, Crosby K, Eveleigh ES, Fernandez-Triana J, Fisher BL, Gibbs J, Hajibabaei  
661 M, Hallwachs W, Hind K, Hrcek J, Huang D-W, Janda M, Janzen DH, Li Y, Miller SE, Packer L,  
662 Quicke D, Ratnasingham S, Rodriguez J, Rougerie R, Shaw MR, Sheffield C, Stahlhut JK,

- 663 Steinke D, Whitfield J, Wood M, and X Zhou. (2012). Wolbachia and DNA barcoding insects:  
664 Patterns, potential, and problems. *PLoS ONE*, 7, e36514 DOI: 10.1371/journal.pone.0036514
- 665 Song H, Buhay JE, Whiting MF, and KA Crandall. (2008). Many species in one: DNA barcoding  
666 overestimates the number of species when nuclear mitochondrial pseudogenes are  
667 coamplified. *Proceedings of the National Academy of Sciences of the United States of*  
668 *America*, 105, 13486-13491 DOI: 10.1073/pnas.0803076105
- 669 Tedersoo L, Anslan S, Bahram M, Polme S, Riit T, Liiv I, Koljalg U, Kisand V, Nilsson H, Hildebrand  
670 F, Bork P, and K Abarenkov. (2015). Shotgun metagenomes and multiple primer pair barcode  
671 combinations of amplicons reveal biases in metabarcoding analyses of fungi. *MycoKeys*, 10,  
672 1-43 DOI: 10.3897/mycokeys.10.4852
- 673 Tedersoo L, Tooming-Klunderud A, and S Anslan. (2018). PacBio metabarcoding of Fungi and  
674 other eukaryotes: errors, biases, and perspectives. *New Phytologist*, 217, 1370-1385
- 675 Tessler M, Neumann JS, Afshinnikoo E, Pineda M, Hersch R, Velho LFM, Segovia BT, Lansac-  
676 Toha FA, Lemke M, DeSalle R, Masone CE, and MR Brugler. (2017). Large-scale differences in  
677 microbial biodiversity discovery between 16S amplicon and shotgun sequencing. *Scientific*  
678 *Reports* 7, 6589
- 679 Thomas AC, Deagle BE, Eveson JP, Harsch CH, and AW Trites. (2015). Quantitative DNA  
680 metabarcoding: improved estimates of species proportional biomass using correction factors  
681 derived from control material. *Molecular Ecology Resources*, 16, 714–726. DOI:  
682 10.1111/1755-0998.12490
- 683 Vasselon V, Bouchez A, Rimet F, Jacquet S, Trobajo R, Corniquel M, Tapolczai K, and I Domaizon.  
684 (2017). Avoiding quantification bias in metabarcoding: Application of a cell biovolume  
685 correction factor in diatom molecular biomonitoring. *Methods in Ecology and Evolution*, 9,  
686 1060-1069 DOI: 10.1111/2041-210X.12960
- 687 Veltri KL, Espiritu M, and G Singh. (1990). Distinct genomic copy number in mitochondria of  
688 different mammalian organs. *Journal of Cellular Physiology*, 143, 160–164 DOI:  
689 10.1002/jcp.1041430122
- 690 Vivien R, Lejzerowicz F, and J Pawlowski. (2016). Next-generation sequencing of aquatic  
691 oligochaetes: Comparison of experimental communities. *PLoS ONE*, 11, e0148644 DOI:  
692 10.1371/journal.pone.0148644
- 693 Vogel G. (2017). Where have all the insects gone? *Science*, 356, 569-579 DOI:  
694 10.1126/science.356.6338.576
- 695 Waldron A, Miller DC, Redding D, Mooers A, Kuhn TS, Nibbelink N, Roberts JT, Tobias JA, and JL  
696 Gittleman. (2017). Reductions in global biodiversity loss predicted from conservation  
697 spending. *Nature*, 551, 364-367 DOI:10.1038/nature24295
- 698 Wickham H. (2009). *ggplot2: Elegant Graphics for Data Analysis*. Springer-Verlag New York

- 699 Wilkinson MJ, Szabo C, Ford CS, Yarom Y, Croxford AE, Camp A, and P Gooding. (2017).  
700 Replacing Sanger with Next Generation Sequencing to improve coverage and quality of  
701 reference DNA barcodes for plants. *Scientific Reports*, 7, 46040 DOI: 10.1038/srep46040
- 702 Yamamoto S, Masuda R, Sato Y, Sado T, Araki H, Kondoh M, Minamoto T, and M Miya. (2017).  
703 Environmental DNA metabarcoding reveals local fish communities in a species-rich coastal  
704 sea. *Scientific Reports*, 7, 40368 DOI: 10.1038/srep40368
- 705 Yu DW, Ji Y, Emerson BC, Wang X, Ye C, Yang C, and Z Ding. (2012). Biodiversity soup:  
706 metabarcoding of arthropods for rapid biodiversity assessment and biomonitoring. *Methods*  
707 *in Ecology and Evolution*, 3, 613-623
- 708 Zimmerman J, Abarca N, Enk N, Skibbe O, Kusber W-H, and R Jahn. (2014). Taxonomic reference  
709 libraries for environmental barcoding: a best practice example from diatom research. *PLoS*  
710 *ONE*, 9, e114758 DOI: 10.1371/journal.pone.01147

711 Figure 1 – Protocol employed to examine species recovery from the mock community. Four  
712 amplicon pools were examined. Two derived from bulk DNA extracts (Bulk Abdomen, Bulk  
713 Leg). The others derived from DNA extracts from single legs that were either pooled  
714 (Composite Leg) or kept separate (Single Leg) prior to PCR. All four amplicon pools were  
715 sequenced on three platforms (Illumina MiSeq, Ion Torrent S5, and Ion Torrent PGM). There  
716 were three technical replicates for each treatment except Single Leg.

717 Figure 2 – Rarefaction curves showing BIN recovery versus the number of sequences analyzed  
718 for the four amplicon pools (Bulk Abdomen, Bulk Leg, Composite Leg, Single Leg) on the  
719 three sequencing platforms. Two amplicon lengths (407 bp, 463 bp) were analyzed on the  
720 S5, but just one (407 bp) on the other platforms.

721 Figure 3A – Bray-Curtis Dissimilarity dendrogram for the four amplicon pools (BA = Bulk  
722 abdomen, BL = Bulk leg, CL = Composite leg, SL = Single Leg). Replicates are numbered 1-3  
723 while P is the result from pooling the replicates. The 463 bp amplicon is indicated with an  
724 asterisk (\*). 3B – Non-metric multidimensional scaling (NMDS) ordinations using Bray-Curtis  
725 dissimilarity for the four amplicon pools. Coloured ellipses represent 95% confidence  
726 intervals for the BIN composition of the different treatments using ordiellipse (Oksanen et al.  
727 2012). The shapes within each ellipse represent replicates for the four combinations of  
728 sequencing platform-amplicon length for three treatments. No replicates were available for  
729 the Single Leg treatment, so it has just four points.

730 Figure 4 – Heat map showing the relative log abundance of the 369 BINs in each treatment for  
731 the four amplicon pools. This heat map was created using the JAMP package  
732 (<https://github.com/VascoElbrecht/JAMP>). Technical replicates are indicated with numbers  
733 while *in silico* pooled results are designated by the letter P.

734 Table 1 – Summary of run results for all treatments. mBRAVE filtering and BIN recovery  
735 including false positives are indicated for the four amplicon pools (BA = Bulk Abdomen, BL =  
736 Bulk Leg, CL = Composite Leg, SL = Single Leg). Replicates are numbered 1-3 and pooled  
737 replicates are denoted by a P. BINs (Barcode Index Number) for not reference library  
738 matches were only counted if their relative abundance was greater than 0.01%. All results  
739 are based on the analysis of a 407 bp amplicon except those marked with a \* which are  
740 based on a 463 bp amplicon.

741 Table 2 – Values for selected diversity indices (Shannon-Weaver, Simpson, Inverse Simpsons,  
742 Pielou's Evenness) for the four amplicon pools (BA = Bulk Abdomen, BL = Bulk Leg, CL =  
743 Composite Leg, SL = Single Leg). Replicates are numbered 1-3 while P is the result from  
744 pooling the replicates. All results are based on the analysis of a 407 bp amplicon except  
745 those marked with a \* which are based on a 463 bp amplicon.



## 746 **Supplementary Figures and Tables**

747 Figure S1A – Phred or quality (QV) scores across read length for 407 bp amplicon on the  
748 Illumina MiSeq, Ion Torrent PGM, and Ion Torrent S5 as well as for 463 bp amplicon on the  
749 Ion Torrent S5. S1B – Histogram of read lengths for the three platforms and two amplicon  
750 lengths on the Ion Torrent S5.

751 Figure S2 – Renyi's diversity graphs using the pooled replicates for the Bulk Abdomen, Bulk Leg,  
752 and Composite Leg treatments and the single replicate for the Single Leg treatment.

753 Figure S3 – Density plots based on the relative abundance for the 369 BINs common across all  
754 treatments. The results from Bulk Abdomen, Bulk Leg, Composite Leg, and Single Leg PCR are  
755 represented by blue, green, red, and black lines respectively. Each panel represents a  
756 different sequencing platform: A) 463 bp on the Ion Torrent S5, B) 407 bp on the Ion Torrent  
757 S5, C) 407 bp on the Illumina MiSeq, and D) 407 bp on the Ion Torrent PGM.

758 Figure S4 – Jaccard Similarity dendrogram for the four amplicon pools (BA = Bulk Abdomen, BL =  
759 Bulk Leg, CL = Composite Leg, SL = Single Leg). Replicates are numbered 1-3 while P is the  
760 result from pooling the replicates. The 463 bp amplicon is indicated with an asterisk (\*).

761 Figure S5 – Non-metric multidimensional scaling (NMDS) ordinations using Bray-Curtis  
762 dissimilarity for the four amplicon pools (BA = Bulk Abdomen, BL = Bulk Leg, CL = Composite  
763 Leg, SL = Single Leg). Coloured ellipses represent 95% confidence intervals for the BIN  
764 composition of the different treatments using ordiellipse (Oksanen et al. 2012). No replicates  
765 were available for the Single Leg treatment, so it has just four points.

766 Table S1 – Taxonomy and results for the mock communities used in this study. A) includes the  
767 read depth for each BIN while B) shows the relative abundance of each BIN in the different  
768 mock communities for the four amplicon pools (BA = Bulk Abdomen, BL = Bulk Leg, CL =  
769 Composite Leg, SL = Single Leg). Replicates are numbered 1-3 while P is the result from  
770 pooling the replicates. The 463 bp amplicon is indicated with an asterisk (\*).

771 Table S2 – Primer sequences for the different platforms. A) primer sequences for Ion Torrent  
772 PGM and S5 and B) primers for the Illumina MiSeq including the COI primer (red) and unique  
773 molecular identifiers (UMIs; green). The Nextera Transposase adapters have two  
774 components: an adaptor sequence (yellow) and a sequencing primer (purple). Sequencing  
775 adaptors (Ion Torrent PGM and S5) and flow cell adapters (Illumina) are shown in blue.

776 Table S3 – Slopes from rarefaction curve at the prior 1, 2, 3, 5, and 10 points for the four  
777 amplicon pools (BA = Bulk Abdomen, BL = Bulk Leg, CL = Composite Leg, SL = Single Leg).  
778 Replicates are numbered 1-3 while P is the result from pooling the replicates. The 463 bp  
779 amplicon is indicated with an asterisk (\*).

780 Table S4 – Summary table of primer mismatches for the 463 bp and 407 bp amplicons for A)  
781 each BIN and B) mean read depth per primer mismatch for the four amplicon pools (BA =  
782 Bulk Abdomen, BL = Bulk Leg, CL = Composite Leg, SL = Single Leg). Replicates are numbered

783 1-3 while P is the result from pooling the replicates. The 463 bp amplicon is indicated with an  
784 asterisk (\*).

785 Tables S5 – Read depth and relative abundance for each treatment and replicate by A) Order  
786 and B) Family for the four amplicon pools (BA = Bulk Abdomen, BL = Bulk Leg, CL =  
787 Composite Leg, SL = Single Leg). Replicates are numbered 1-3 while P is the result from  
788 pooling the replicates. The 463 bp amplicon is indicated with an asterisk (\*).

789

790 **Other Supplementary material**

791 MBRAVE\_OTUmerger\_MER.R – R script for combining mBRAVE OTU tables into single file.

792 OTU\_subsamplere\_MER.R – R Script for generating rarefaction curves from an OTU table.

369 BINs  
(2% p-distance)

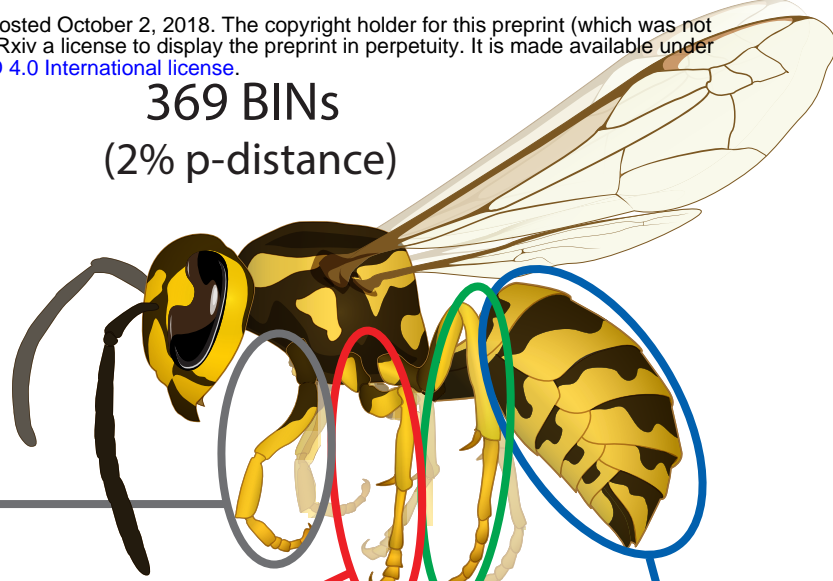

Mapping Against Haplotype in mBRAVE (Custom Database)

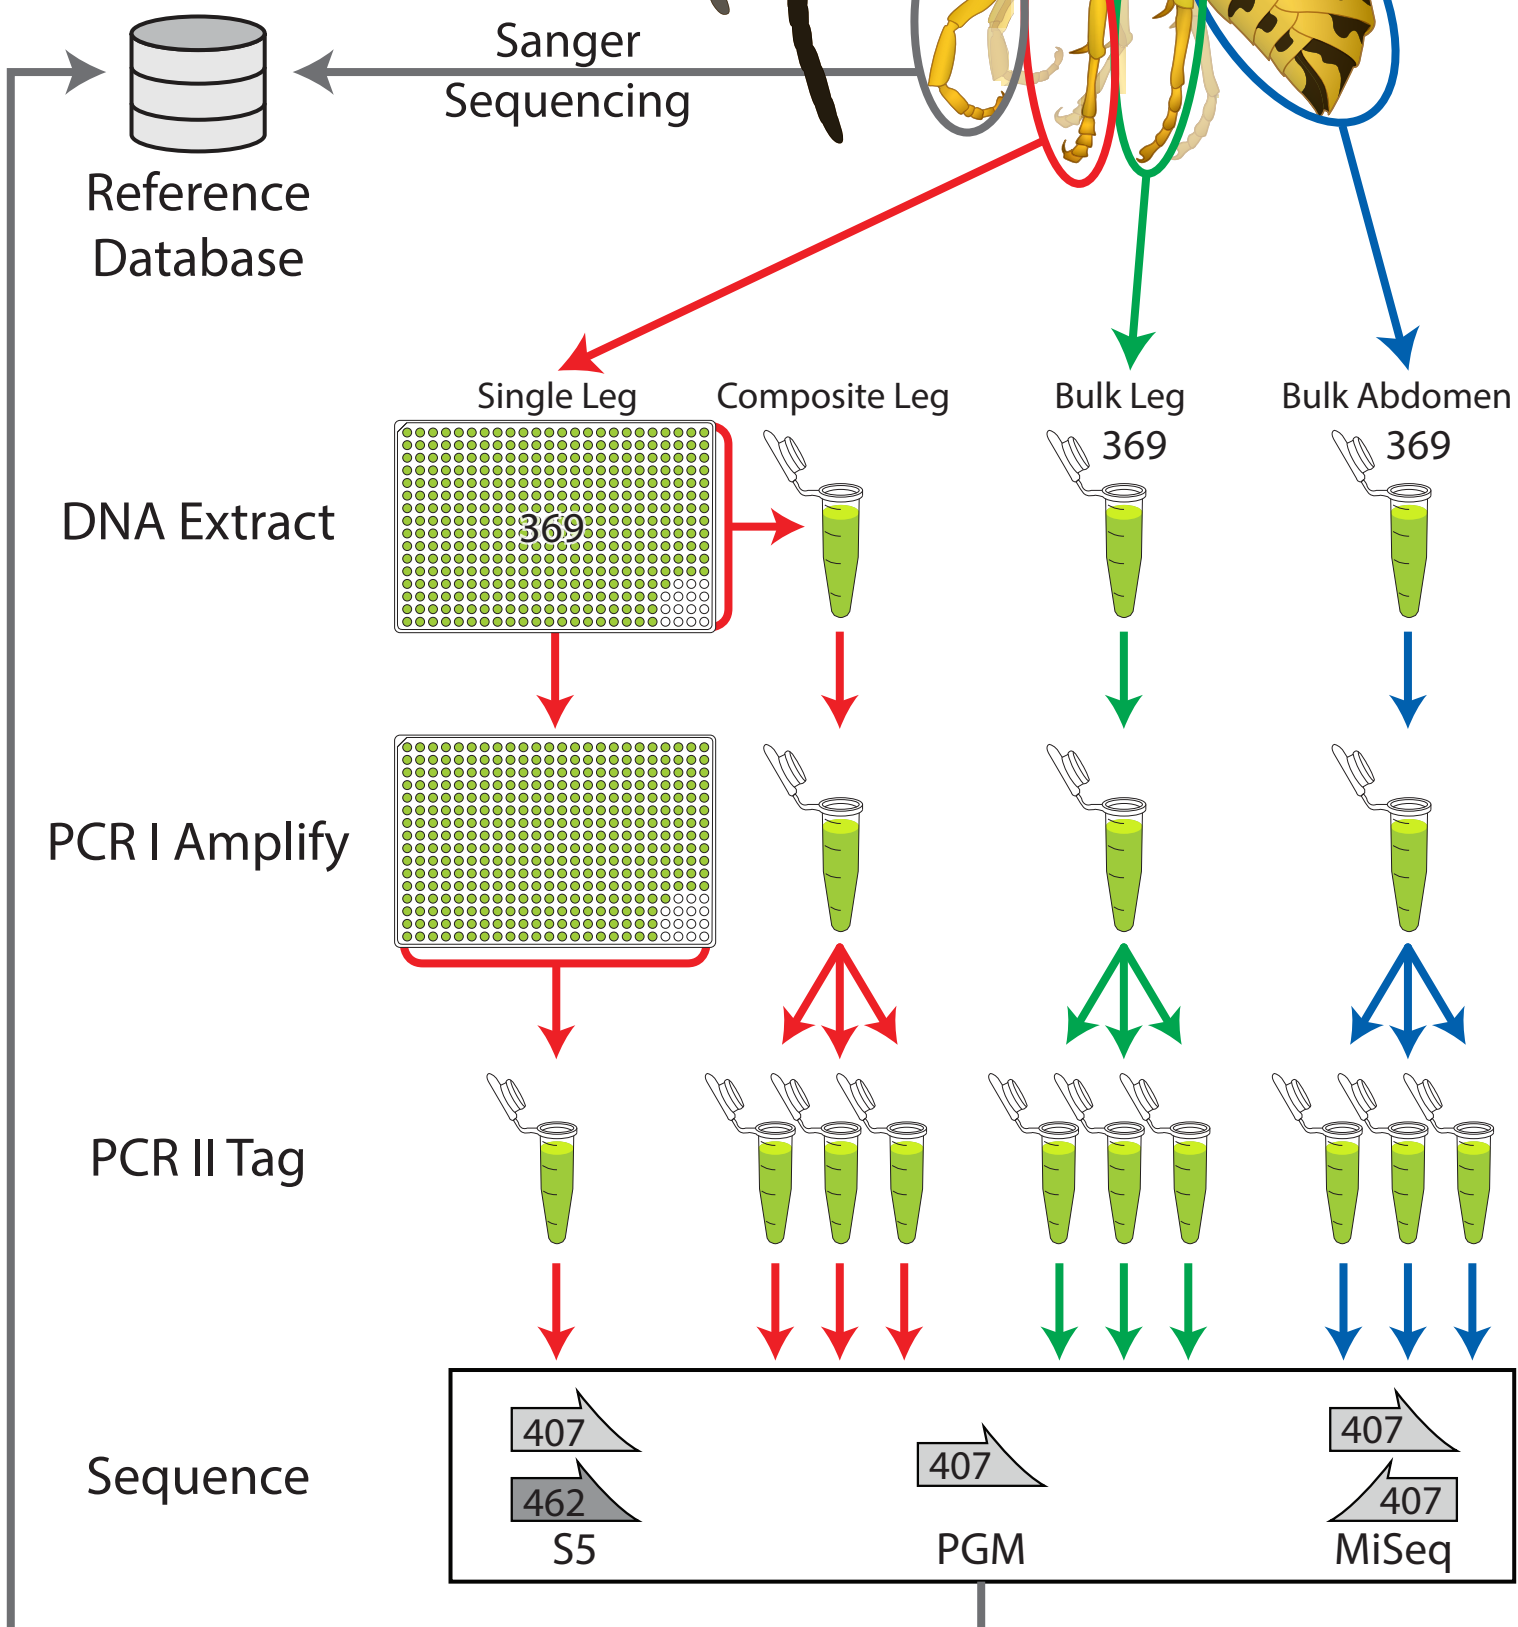

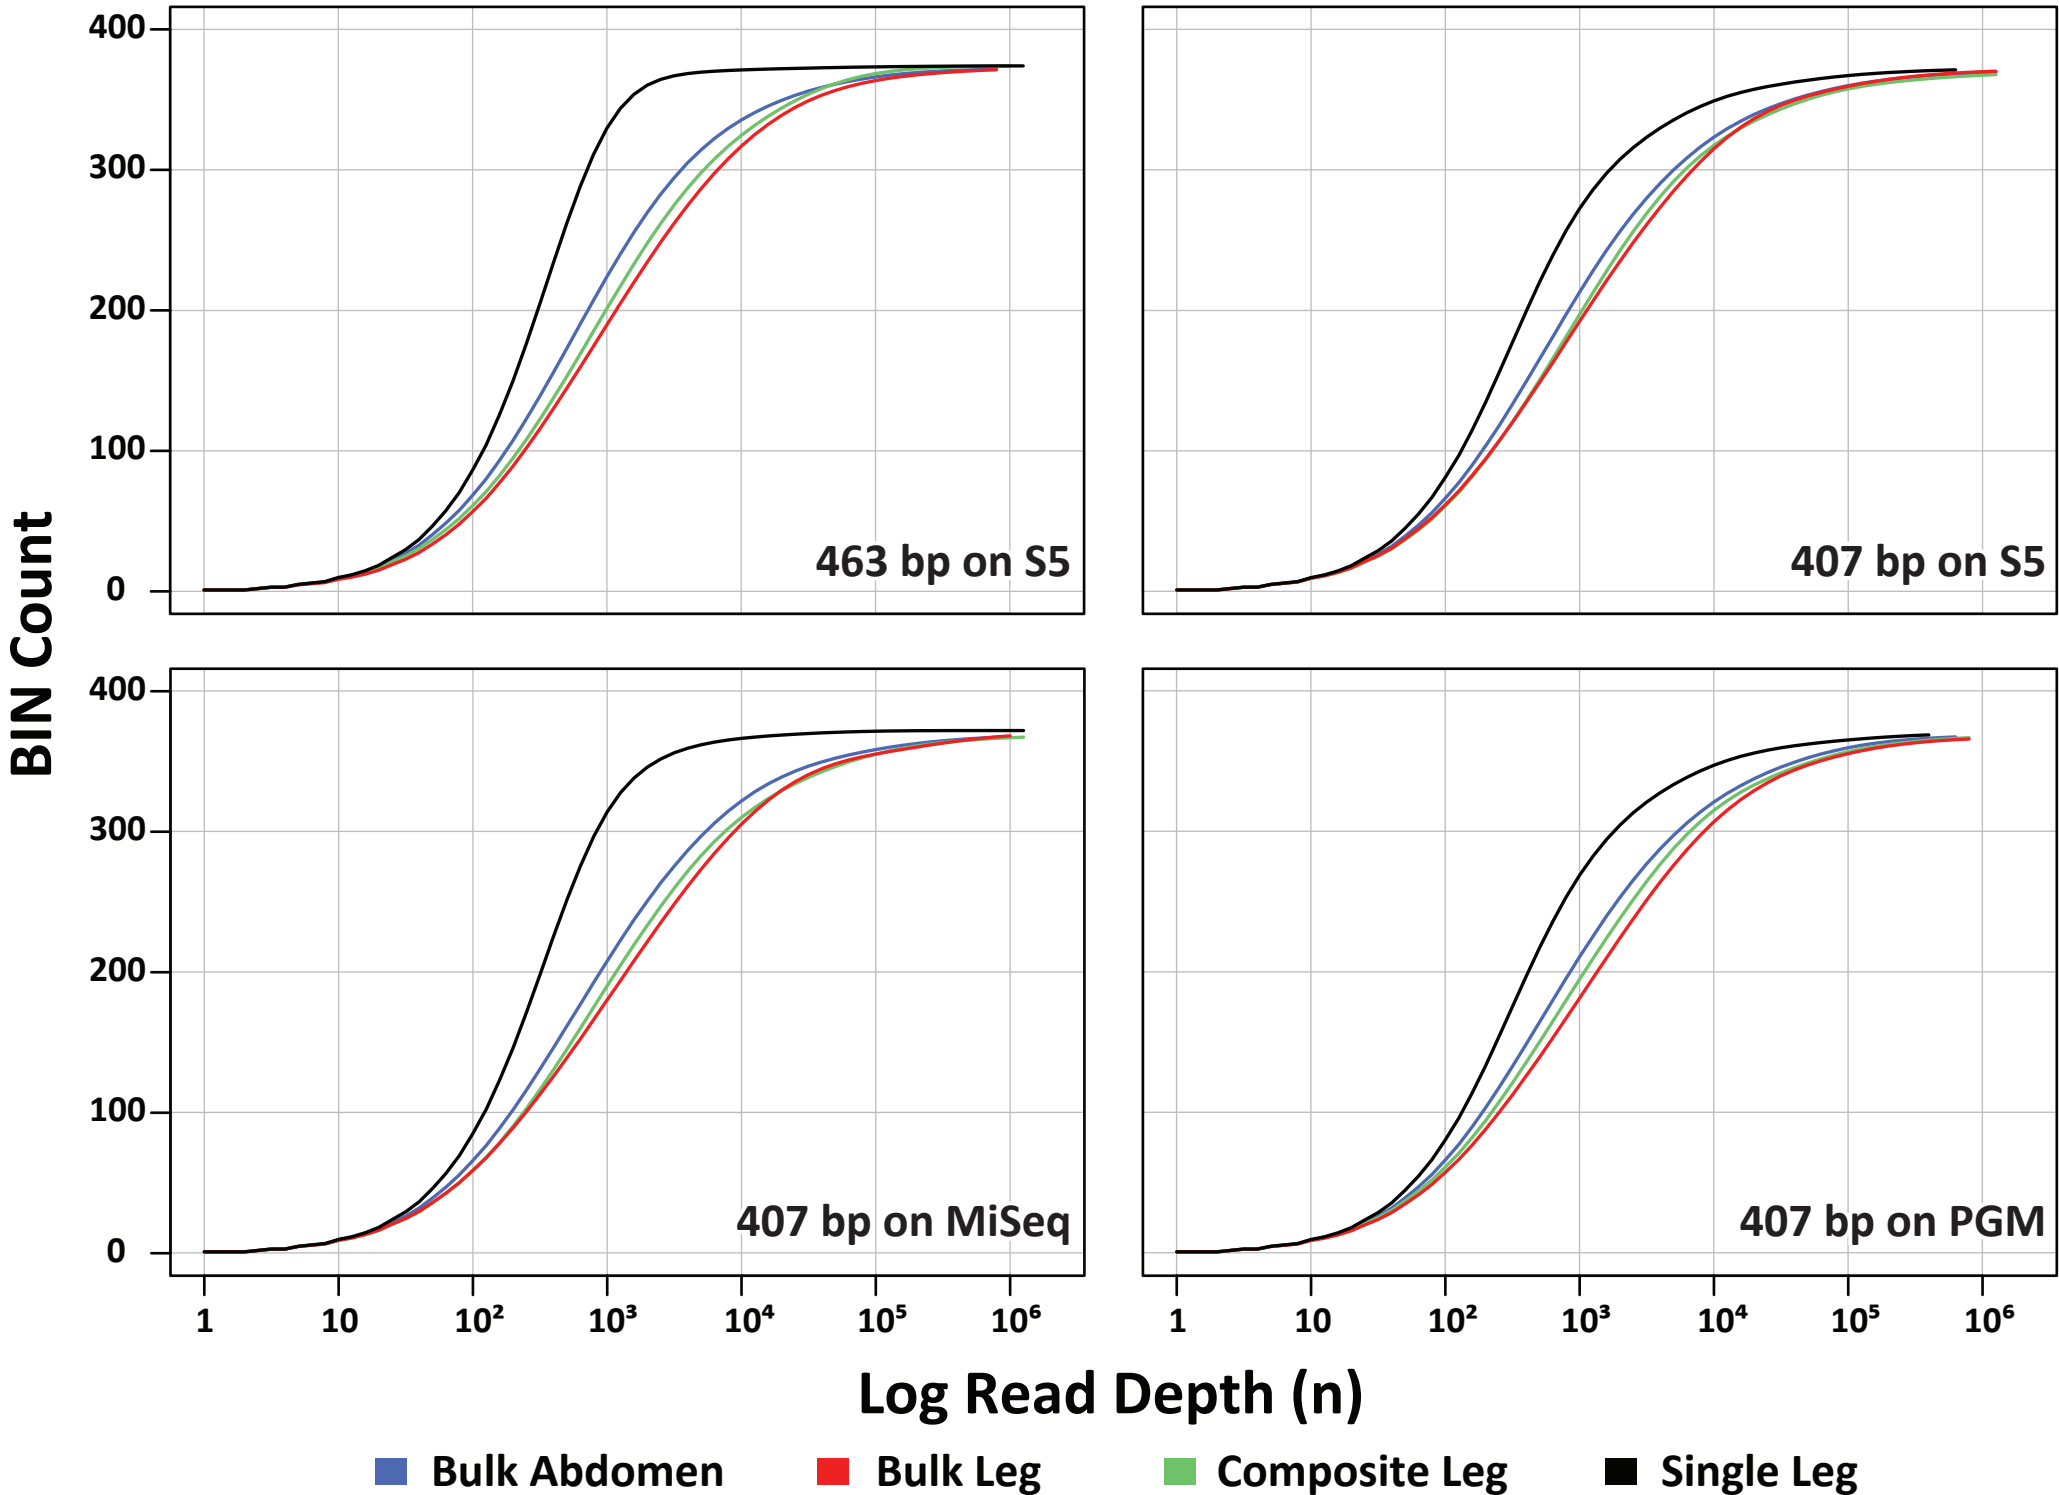

# A) Bray-Curtis Dissimilarity

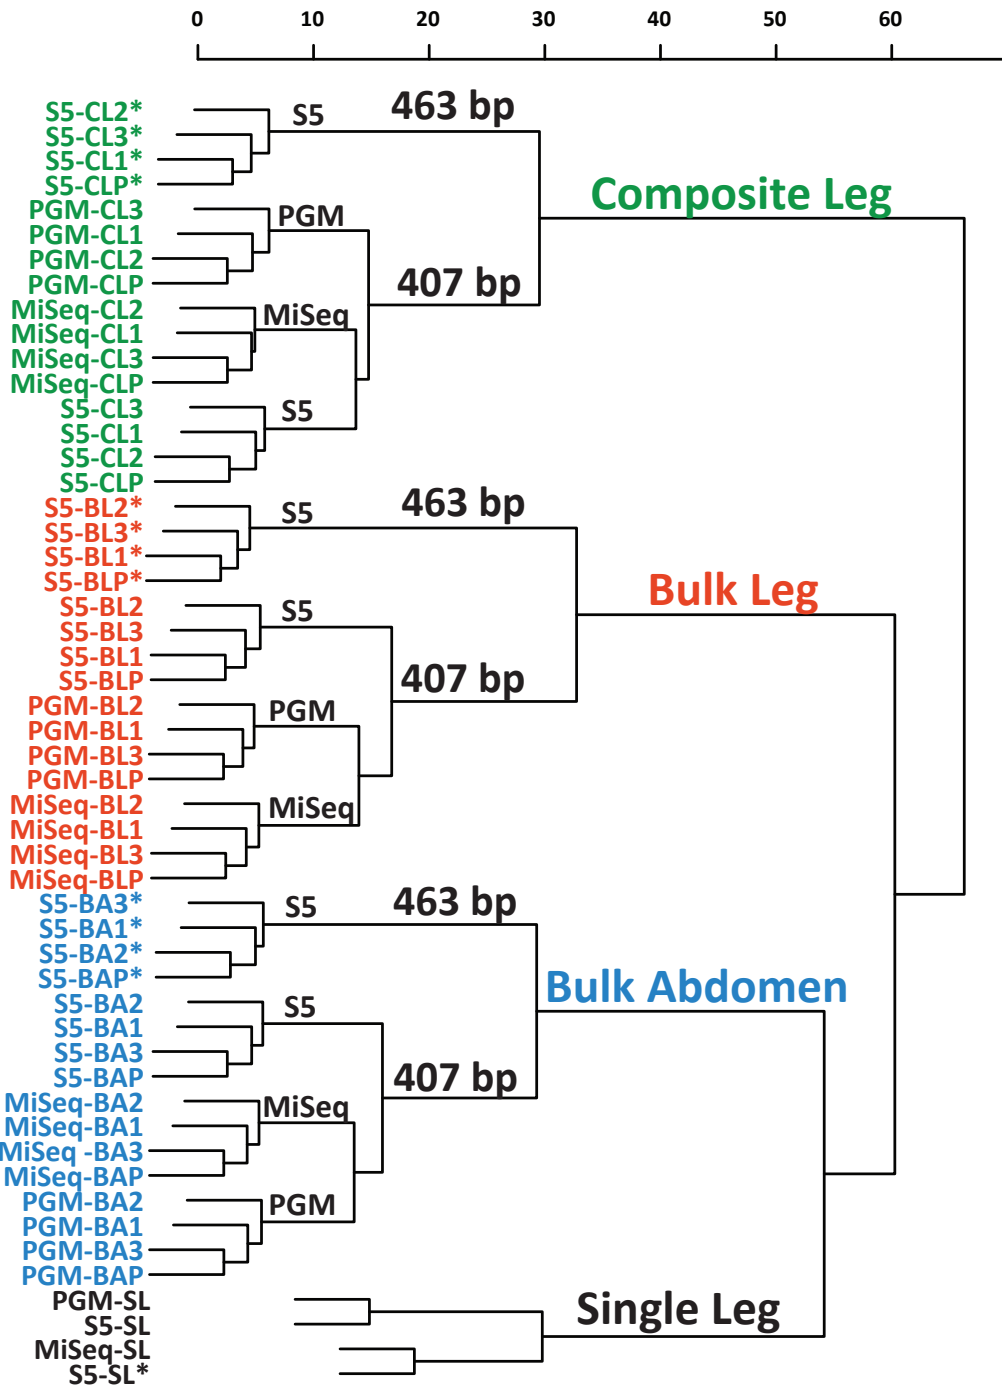

# B) NMDS

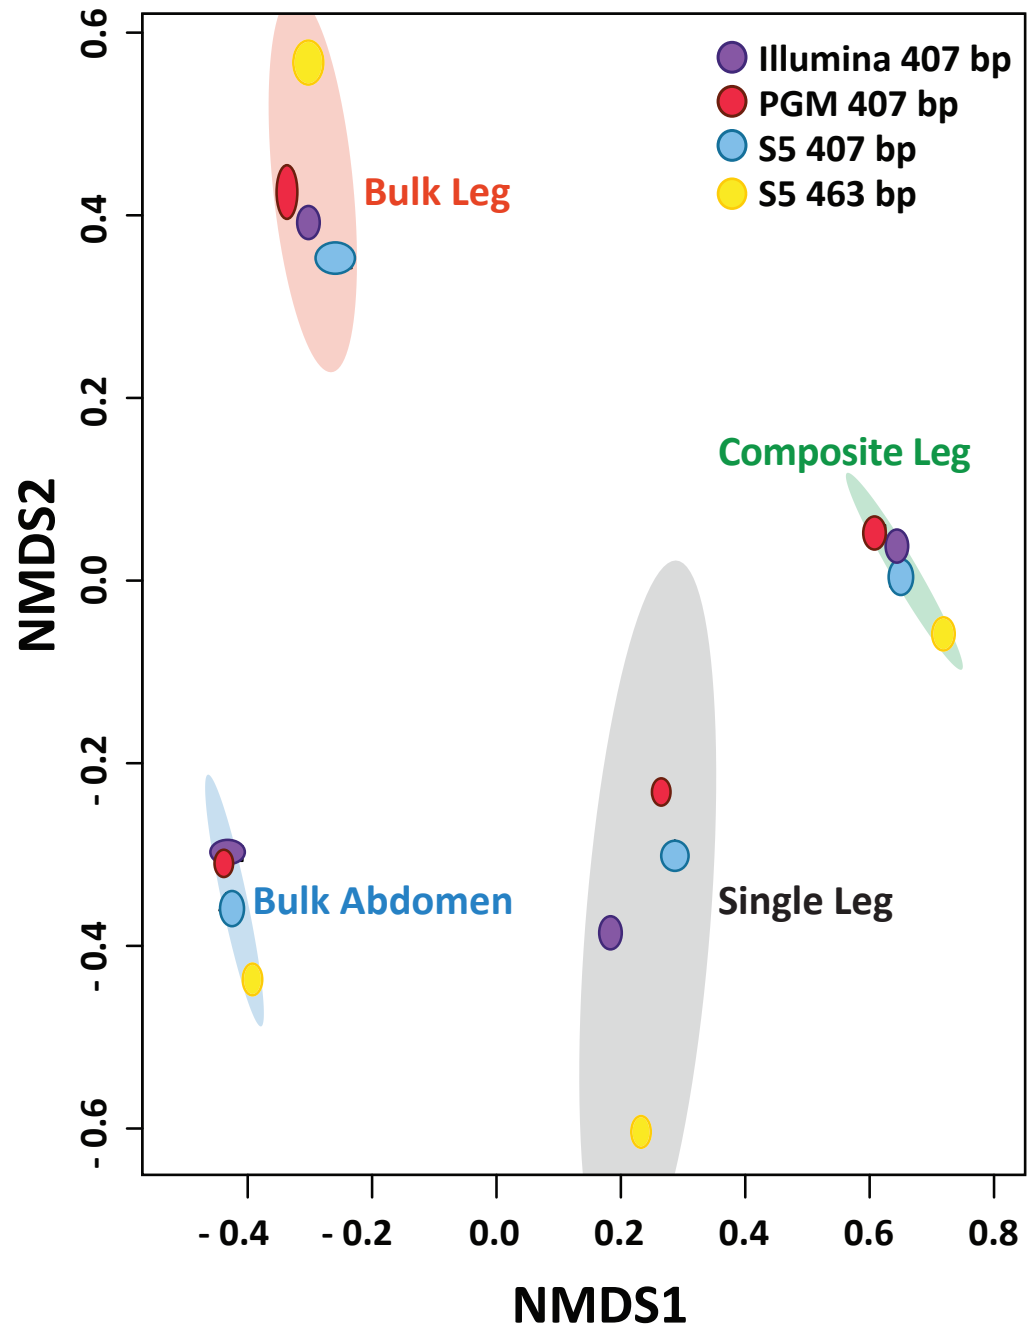



| Platform | Treatment (Replicate #) |                    |                       |                  |         |          |                                  |                |                 |                 |                    |                     |                |                  |             |                  |                 |                     |                     |       |    |
|----------|-------------------------|--------------------|-----------------------|------------------|---------|----------|----------------------------------|----------------|-----------------|-----------------|--------------------|---------------------|----------------|------------------|-------------|------------------|-----------------|---------------------|---------------------|-------|----|
|          |                         | uploaded reads (n) | post filter reads (n) | mean length (bp) | mean QV | mean GC% | Reads matching reference library | BINs recovered | BINS > 0.01% RA | BINS > 0.01% RA | chimeric reads (n) | Bacterial reads (n) | Bacterial BINs | Insect reads (n) | Insect BINs | non-insect reads | non-insect BINs | unmatched reads (n) | unmatched read OTUs |       |    |
| MiSeq    | BA1                     | 357146             | 356697                | 405              | 36.13   | 0.319    |                                  | 323704         | 364             | 317             | 57                 |                     | 26356          | 37               | 0           | 951              | 5               | 1                   | 0                   | 5648  | 13 |
|          | BA2                     | 403622             | 403052                | 405              | 36.18   | 0.319    |                                  | 368224         | 362             | 315             | 59                 |                     | 27648          | 49               | 0           | 1183             | 4               | 0                   | 0                   | 5948  | 17 |
|          | BA3                     | 506268             | 505585                | 405              | 36.17   | 0.319    |                                  | 460032         | 364             | 318             | 56                 |                     | 36377          | 63               | 0           | 1319             | 4               | 13                  | 0                   | 7781  | 20 |
|          | BAP                     | 1267036            | 1265534               | 405              | 36.16   | 0.319    |                                  | 1151960        | 369             | 316             | 58                 |                     | 91560          | 149              | 0           | 3453             | 4               | 14                  | 0                   | 18198 | 14 |
|          | BL1                     | 422755             | 422421                | 405              | 36.12   | 0.320    |                                  | 382545         | 360             | 293             | 81                 |                     | 32008          | 46               | 0           | 1139             | 3               | 9                   | 0                   | 6674  | 18 |
|          | BL2                     | 373342             | 373126                | 405              | 35.99   | 0.319    |                                  | 337850         | 362             | 296             | 78                 |                     | 27706          | 34               | 0           | 1079             | 5               | 17                  | 0                   | 6440  | 20 |
|          | BL3                     | 546462             | 546060                | 405              | 36.25   | 0.321    |                                  | 495255         | 364             | 290             | 84                 |                     | 40309          | 43               | 0           | 1491             | 4               | 5                   | 0                   | 8957  | 23 |
|          | BLP                     | 1342560            | 1341607               | 405              | 36.14   | 0.320    |                                  | 1215650        | 370             | 297             | 77                 |                     | 101231         | 123              | 0           | 3709             | 3               | 31                  | 0                   | 20863 | 22 |
|          | CL1                     | 521445             | 521181                | 405              | 36.26   | 0.319    |                                  | 472713         | 361             | 296             | 78                 |                     | 28023          | 51               | 0           | 1518             | 8               | 25                  | 0                   | 8851  | 19 |
|          | CL2                     | 442923             | 442543                | 405              | 36.12   | 0.320    |                                  | 398739         | 366             | 296             | 78                 |                     | 35139          | 21               | 0           | 1122             | 4               | 1                   | 0                   | 7521  | 20 |
|          | CL3                     | 545824             | 545602                | 405              | 36.24   | 0.319    |                                  | 492799         | 362             | 304             | 70                 |                     | 42018          | 33               | 0           | 1508             | 5               | 5                   | 0                   | 9239  | 16 |
|          | CLP                     | 1510192            | 1509326               | 405              | 36.27   | 0.319    |                                  | 1364250        | 369             | 303             | 71                 |                     | 116265         | 105              | 0           | 4132             | 5               | 31                  | 0                   | 24542 | 20 |
|          | SL                      | 1542853            | 1540592               | 405              | 36.23   | 0.315    |                                  | 1513470        | 372             | 365             | 9                  |                     | 2338           | 521              | 0           | 7586             | 10              | 133                 | 0                   | 16543 | 6  |
| PGM      | BA1                     | 473837             | 259691                | 381              | 27.62   | 0.321    |                                  | 243861         | 366             | 316             | 58                 |                     | 6707           | 32               | 0           | 961              | 7               | 2                   | 0                   | 8128  | 16 |
|          | BA2                     | 448934             | 258358                | 381              | 27.72   | 0.321    |                                  | 242366         | 362             | 312             | 62                 |                     | 6814           | 62               | 0           | 1066             | 4               | 4                   | 0                   | 8046  | 11 |
|          | BA3                     | 534795             | 326968                | 382              | 27.69   | 0.321    |                                  | 306818         | 362             | 310             | 64                 |                     | 9406           | 63               | 0           | 1246             | 8               | 3                   | 0                   | 9432  | 6  |
|          | BAP                     | 1457566            | 845017                | 382              | 27.68   | 0.321    |                                  | 793045         | 369             | 314             | 60                 |                     | 24707          | 157              | 0           | 3273             | 6               | 9                   | 0                   | 23826 | 9  |
|          | BL1                     | 591907             | 328155                | 379              | 27.63   | 0.324    |                                  | 307657         | 362             | 298             | 76                 |                     | 9672           | 87               | 1           | 1194             | 4               | 10                  | 0                   | 9535  | 9  |
|          | BL2                     | 476860             | 272357                | 380              | 27.61   | 0.323    |                                  | 256701         | 363             | 287             | 87                 |                     | 6835           | 69               | 0           | 1056             | 7               | 20                  | 0                   | 7676  | 10 |
|          | BL3                     | 603124             | 328797                | 380              | 27.7    | 0.324    |                                  | 307758         | 362             | 292             | 82                 |                     | 10234          | 48               | 0           | 1156             | 6               | 6                   | 0                   | 9595  | 12 |
|          | BLP                     | 1671711            | 929309                | 379              | 27.65   | 0.324    |                                  | 872116         | 367             | 286             | 88                 |                     | 28241          | 204              | 0           | 3406             | 4               | 36                  | 0                   | 25306 | 12 |
|          | CL1                     | 532057             | 300890                | 384              | 27.89   | 0.321    |                                  | 285294         | 362             | 303             | 71                 |                     | 7485           | 45               | 0           | 1167             | 7               | 20                  | 0                   | 6879  | 5  |
|          | CL2                     | 519479             | 291023                | 383              | 27.86   | 0.321    |                                  | 277352         | 363             | 311             | 63                 |                     | 6161           | 39               | 0           | 885              | 8               | 1                   | 0                   | 6585  | 6  |
|          | CL3                     | 453785             | 256149                | 384              | 27.83   | 0.321    |                                  | 245042         | 360             | 312             | 62                 |                     | 4616           | 33               | 0           | 769              | 6               | 1                   | 0                   | 5688  | 3  |
|          | CLP                     | 1505320            | 848052                | 384              | 27.86   | 0.321    |                                  | 807688         | 368             | 313             | 61                 |                     | 19978          | 117              | 0           | 2821             | 7               | 22                  | 0                   | 17436 | 4  |
|          | SL                      | 787631             | 438045                | 381              | 27.76   | 0.319    |                                  | 420427         | 370             | 347             | 27                 |                     | 3207           | 96               | 0           | 2423             | 14              | 15                  | 0                   | 11877 | 6  |
| SS       | BA1                     | 1032904            | 435627                | 396              | 27.01   | 0.322    |                                  | 416248         | 365             | 317             | 57                 |                     | 9616           | 111              | 0           | 1478             | 4               | 6                   | 0                   | 8168  | 10 |
|          | BA2                     | 935020             | 408907                | 396              | 27.02   | 0.322    |                                  | 390537         | 364             | 317             | 57                 |                     | 8652           | 194              | 1           | 1628             | 3               | 3                   | 0                   | 7893  | 11 |
|          | BA3                     | 1140310            | 537677                | 396              | 27.18   | 0.322    |                                  | 512138         | 366             | 316             | 58                 |                     | 13650          | 129              | 1           | 1821             | 3               | 10                  | 0                   | 9929  | 12 |
|          | BAP                     | 3108238            | 1382211               | 396              | 27.08   | 0.322    |                                  | 1318940        | 370             | 317             | 57                 |                     | 34739          | 434              | 1           | 4889             | 4               | 19                  | 0                   | 23129 | 9  |
|          | BL1                     | 1145406            | 489294                | 393              | 27.03   | 0.321    |                                  | 460637         | 365             | 304             | 70                 |                     | 14549          | 227              | 1           | 1640             | 3               | 5                   | 0                   | 12236 | 12 |
|          | BL2                     | 925531             | 401390                | 394              | 27.06   | 0.321    |                                  | 379942         | 363             | 309             | 65                 |                     | 10055          | 167              | 1           | 1584             | 4               | 12                  | 0                   | 9630  | 13 |
|          | BL3                     | 1186802            | 491140                | 393              | 26.98   | 0.322    |                                  | 461824         | 364             | 305             | 69                 |                     | 15258          | 161              | 1           | 1495             | 3               | 8                   | 0                   | 12394 | 14 |
|          | BLP                     | 3257559            | 1381824               | 393              | 27.02   | 0.321    |                                  | 1302400        | 371             | 310             | 64                 |                     | 42257          | 555              | 1           | 4719             | 2               | 25                  | 0                   | 31865 | 13 |
|          | CL1                     | 1188057            | 547727                | 396              | 27.26   | 0.321    |                                  | 521824         | 364             | 304             | 70                 |                     | 14012          | 128              | 0           | 1706             | 9               | 17                  | 0                   | 10040 | 8  |
|          | CL2                     | 1029459            | 479655                | 396              | 27.22   | 0.320    |                                  | 459412         | 366             | 310             | 64                 |                     | 10286          | 140              | 1           | 1128             | 5               | 5                   | 0                   | 8684  | 7  |
|          | CL3                     | 991378             | 474744                | 396              | 27.32   | 0.320    |                                  | 456177         | 363             | 311             | 63                 |                     | 8722           | 151              | 1           | 1203             | 3               | 3                   | 0                   | 8488  | 8  |
|          | CLP                     | 3208890            | 1502126               | 396              | 27.27   | 0.320    |                                  | 1437430        | 369             | 311             | 63                 |                     | 35561          | 419              | 0           | 3991             | 6               | 25                  | 0                   | 24700 | 6  |
|          | SL                      | 1735346            | 769426                | 394              | 27.12   | 0.319    |                                  | 743673         | 372             | 348             | 26                 |                     | 4778           | 350              | 1           | 3262             | 7               | 24                  | 0                   | 17339 | 10 |
|          | BA1*                    | 906390             | 401586                | 447              | 27.27   | 0.323    |                                  | 336480         | 372             | 331             | 43                 |                     | 48317          | 1095             | 4           | 1293             | 5               | 44                  | 0                   | 14357 | 11 |
|          | BA2*                    | 817662             | 379557                | 448              | 27.3    | 0.323    |                                  | 315568         | 368             | 327             | 47                 |                     | 48099          | 814              | 4           | 1452             | 8               | 37                  | 0                   | 13587 | 8  |
|          | BA3*                    | 858365             | 383034                | 448              | 27.22   | 0.324    |                                  | 322595         | 370             | 331             | 43                 |                     | 45058          | 975              | 3           | 1194             | 7               | 12                  | 0                   | 13200 | 10 |
|          | BAP*                    | 2582420            | 1164177               | 448              | 27.27   | 0.323    |                                  | 974643         | 372             | 331             | 43                 |                     | 148719         | 2884             | 4           | 3939             | 5               | 93                  | 0                   | 33899 | 7  |
|          | BL1*                    | 790492             | 366040                | 450              | 27.32   | 0.326    |                                  | 310157         | 369             | 305             | 69                 |                     | 41399          | 878              | 4           | 1190             | 7               | 20                  | 0                   | 12396 | 14 |
|          | BL2*                    | 865993             | 393835                | 450              | 27.3    | 0.327    |                                  | 333924         | 369             | 306             | 68                 |                     | 44241          | 848              | 4           | 1143             | 6               | 26                  | 0                   | 13653 | 15 |
|          | BL3*                    | 857754             | 383518                | 449              | 27.32   | 0.326    |                                  | 324214         | 370             | 306             | 68                 |                     | 44200          | 770              | 5           | 1116             | 5               | 14                  | 0                   | 13204 | 14 |
| BLP*     | 2514240                 | 1143393            | 450                   | 27.31            | 0.326   |          | 968295                           | 372            | 308             | 66              |                    | 135142              | 2496           | 3                | 3449        | 7                | 60              | 0                   | 33951               | 17    |    |
| CL1*     | 965017                  | 468482             | 449                   | 27.4             | 0.324   |          | 388336                           | 372            | 312             | 62              |                    | 58208               | 359            | 3                | 2057        | 10               | 8               | 0                   | 19214               | 36    |    |
| CL2*     | 860367                  | 431266             | 449                   | 27.41            | 0.323   |          | 363098                           | 374            | 312             | 62              |                    | 49241               | 445            | 2                | 1830        | 10               | 5               | 0                   | 16647               | 29    |    |
| CL3*     | 806183                  | 403854             | 449                   | 27.38            | 0.324   |          | 341946                           | 373            | 311             | 63              |                    | 44404               | 505            | 3                | 1579        | 11               | 33              | 0                   | 15117               | 27    |    |
| CLP*     | 2631840                 | 1303332            | 449                   | 27.4             | 0.324   |          | 1093380                          | 374            | 312             | 62              |                    | 156996              | 1609           | 3                | 5466        | 8                | 46              | 0                   | 45835               | 35    |    |
| SL*      | 3301111                 | 1549636            | 449                   | 27.41            | 0.323   |          | 1477380                          | 374            | 371             | 3               |                    | 23821               | 8227           | 5                | 9886        | 14               | 1877            | 3                   | 28444               | 4     |    |

| Platform             | Treatment (Replicate #) | Pielou's Evenness | Simpson's | InvSimpson | Shannon Weaver |
|----------------------|-------------------------|-------------------|-----------|------------|----------------|
| MiSeq                | BA1                     | 0.84              | 0.99      | 83.39      | 4.96           |
|                      | BA2                     | 0.84              | 0.99      | 83.89      | 4.96           |
|                      | BA3                     | 0.84              | 0.99      | 82.55      | 4.95           |
|                      | BAP                     | 0.84              | 0.99      | 83.38      | 4.96           |
|                      | BL1                     | 0.80              | 0.98      | 55.48      | 4.68           |
|                      | BL2                     | 0.79              | 0.98      | 55.51      | 4.66           |
|                      | BL3                     | 0.79              | 0.98      | 52.16      | 4.65           |
|                      | BLP                     | 0.79              | 0.98      | 54.23      | 4.67           |
|                      | CL1                     | 0.79              | 0.98      | 47.39      | 4.65           |
|                      | CL2                     | 0.79              | 0.98      | 48.17      | 4.64           |
|                      | CL3                     | 0.80              | 0.98      | 49.44      | 4.67           |
|                      | CLP                     | 0.79              | 0.98      | 48.47      | 4.66           |
|                      | SL                      | 0.98              | 1.00      | 294.42     | 5.76           |
| PGM                  | BA1                     | 0.84              | 0.99      | 80.52      | 4.97           |
|                      | BA2                     | 0.84              | 0.99      | 80.15      | 4.96           |
|                      | BA3                     | 0.85              | 0.99      | 81.80      | 4.97           |
|                      | BAP                     | 0.84              | 0.99      | 81.04      | 4.97           |
|                      | BL1                     | 0.78              | 0.98      | 40.80      | 4.58           |
|                      | BL2                     | 0.78              | 0.98      | 41.45      | 4.58           |
|                      | BL3                     | 0.78              | 0.98      | 41.43      | 4.59           |
|                      | BLP                     | 0.78              | 0.98      | 41.26      | 4.59           |
|                      | CL1                     | 0.81              | 0.98      | 58.74      | 4.74           |
|                      | CL2                     | 0.81              | 0.98      | 60.84      | 4.76           |
|                      | CL3                     | 0.82              | 0.98      | 63.78      | 4.79           |
|                      | CLP                     | 0.81              | 0.98      | 61.12      | 4.77           |
|                      | SL                      | 0.94              | 1.00      | 212.46     | 5.53           |
| S5                   | BA1                     | 0.84              | 0.99      | 78.96      | 4.96           |
|                      | BA2                     | 0.84              | 0.99      | 79.87      | 4.97           |
|                      | BA3                     | 0.84              | 0.99      | 80.04      | 4.97           |
|                      | BAP                     | 0.84              | 0.99      | 79.83      | 4.97           |
|                      | BL1                     | 0.81              | 0.98      | 64.51      | 4.79           |
|                      | BL2                     | 0.81              | 0.98      | 64.35      | 4.78           |
|                      | BL3                     | 0.81              | 0.98      | 63.59      | 4.78           |
|                      | BLP                     | 0.81              | 0.98      | 64.27      | 4.79           |
|                      | CL1                     | 0.80              | 0.98      | 51.54      | 4.71           |
|                      | CL2                     | 0.80              | 0.98      | 54.07      | 4.73           |
|                      | CL3                     | 0.81              | 0.98      | 55.41      | 4.76           |
|                      | CLP                     | 0.80              | 0.98      | 53.67      | 4.74           |
|                      | SL                      | 0.94              | 1.00      | 217.39     | 5.54           |
|                      | BA1*                    | 0.86              | 0.99      | 95.11      | 5.07           |
|                      | BA2*                    | 0.86              | 0.99      | 95.49      | 5.07           |
|                      | BA3*                    | 0.86              | 0.99      | 92.22      | 5.05           |
|                      | BAP*                    | 0.86              | 0.99      | 94.57      | 5.07           |
|                      | BL1*                    | 0.75              | 0.95      | 22.20      | 4.45           |
|                      | BL2*                    | 0.75              | 0.95      | 21.39      | 4.43           |
|                      | BL3*                    | 0.76              | 0.96      | 22.70      | 4.46           |
|                      | BLP*                    | 0.75              | 0.95      | 22.09      | 4.45           |
|                      | CL1*                    | 0.81              | 0.98      | 60.80      | 4.78           |
|                      | CL2*                    | 0.80              | 0.98      | 51.09      | 4.72           |
| CL3*                 | 0.81                    | 0.98              | 60.73     | 4.79       |                |
| CLP*                 | 0.81                    | 0.98              | 58.16     | 4.77       |                |
| SL*                  | 0.99                    | 1.00              | 319.57    | 5.82       |                |
| <b>Index Maximum</b> |                         | 1.00              | 1.00      | 369.00     | 5.91           |
